# Supplementary material
Source: PubMed Central journal article supplement (PMC5710448)
Supplement: jamacardiol-2-1130-s001.pdf [file jamacardiol-2-1130-s001.pdf]

## Supplementary Online Content

Sannino A, Smith RL II, Schiattarella GG, Trimarco B, Esposito G, Grayburn PA. Survival and cardiovascular outcomes of patients with secondary mitral regurgitation: a systematic review and meta-analysis. *JAMA Cardiol*. Published online September 6, 2017. doi:10.1001/jamacardio.2017.2976

**Table 1.** Baseline Characteristics of the Included Studies

**eTable 2.** Data Extraction and Relative Adjustment for the Primary Outcome (All-Cause Mortality)

**eTable 3.** Values of LVEF and LVESV According to SMR Grade in the Included Studies

**eTable 4.** SMR Detection and Quantitation Methods Used in the Included Studies and Relative Study Population

**eTable 5.** Newcastle-Ottawa Quality Assessment Scale

**eTable 6.** Leave-One-Out Sensitivity Analysis for the Primary End Point (Results After Removing 1 Study at a Time)

**eTable 7.** Additional Sensitivity Analysis for the Primary Outcome

**eTable 8.** Meta-regression Analysis for All-Cause Mortality

**eFigure 1.** Secondary Outcome: Hospitalization for Heart Failure

**eFigure 2.** Secondary Outcome: Cardiac Mortality

**eFigure 3.** Secondary Outcome: Composite Outcome of Death, Hospitalization for Heart Failure, and Transplant

**eFigure 4.** Fixed-Effects Analysis for All-Cause Mortality

**eFigure 5.** Analysis of All-Cause Mortality, Including Only Studies Reporting Adjusted Estimates. A, SMR detected at echocardiography and qualitatively graded. B, SMR detected at echocardiography and quantitatively graded. C, SMR present vs absent detected either at echocardiography or ventriculography.

**eFigure 6.** Subgroup Analysis for All-Cause Mortality According to SMR Pathogenesis

**eFigure 7.** Meta-regression Plots. A, NYHA class III-IV. B, Follow-up length in studies reporting SMR as present vs absent. C, Follow-up length in studies qualitatively reporting SMR.

**eFigure 8.** Funnel Plot for the Primary Outcome

**eFigure 9.** Funnel Plot for the Secondary Outcomes

This supplementary material has been provided by the authors to give readers additional information about their work.

**eTable 1.** Baseline Characteristics of the Included Studies

| Author, Ref <sup>#</sup>        | Year | N     | Male gender, % | Follow-up | Age, years | NYHA class I-II | NYHA class III-IV | Ischemic etiology, % | Previous MI, % | ICD, % | CRT, % | AF, % |
|---------------------------------|------|-------|----------------|-----------|------------|-----------------|-------------------|----------------------|----------------|--------|--------|-------|
| Abate E. <sup>1</sup>           | 2016 | 1599  | 77             | 50 m      | 60±12      | N/A             | N/A               | 100                  | 9              | N/A    | N/A    | N/A   |
| Agricola E. <sup>2</sup>        | 2009 | 404   | 77.7           | 3.3±2.1 y | 70.2±10    | N/A             | 36                | 76.5                 | N/A            | 19.8   | 11.8   | 18.3  |
| Agricola E. <sup>3</sup>        | 2010 | 198   | 67             | 37 m      | 66±12      | N/A             | N/A               | 0                    | N/A            | N/A    | N/A    | N/A   |
| Aronson D. <sup>4</sup>         | 2006 | 1190  | 83.3           | 24 m      | 58±12      | N/A             | N/A               | 100                  | 14.6           | N/A    | N/A    | N/A   |
| Barra S. <sup>5</sup>           | 2012 | 796   | 63.2           | 24 m      | 68.8±13.4  | N/A             | N/A               | 100                  | 26.4           | N/A    | N/A    | 35.2  |
| Boriani G. <sup>6</sup>         | 2012 | 659   | 89.5           | 15 m      | 66.3±9     | 19.5            | 80.5              | 68                   | N/A            | N/A    | N/A    | 11.5  |
| Bruch C. <sup>7</sup>           | 2007 | 370   | 78             | 790 d     | 59±13      | N/A             | N/A               | 56                   | N/A            | N/A    | N/A    | N/A   |
| Bursi F. <sup>8</sup>           | 2005 | 773   | 51.3           | 4.7 y     | 69.6±11    | N/A             | N/A               | 100                  | N/A            | N/A    | N/A    | N/A   |
| Bursi F. <sup>9</sup>           | 2010 | 469   | 66.7           | 5.1 y     | 59.6±13.3  | 67.4            | 32.6              | 36.2                 | 27.7           | 16.6   | 11.7   | 14.5  |
| Calafiore AM. <sup>10</sup>     | 2008 | 4226  | 82.6           | 102 m     | 63.6±9.8   | N/A             | N/A               | 100                  | 54.9           | N/A    | N/A    | 1.2   |
| Cioffi F. <sup>11</sup>         | 2005 | 175   | 66.3           | 1 y       | 75.4±5     | 33.1            | 66.9              | 51.4                 | N/A            | N/A    | N/A    | 30.8  |
| Ellis S. <sup>12</sup>          | 2002 | 4221  | 71.9           | 3 y       | 63±11      | 6.8             | 3.0               | 100                  | 53.9           | N/A    | N/A    | N/A   |
| Engstrom AE. <sup>13</sup>      | 2010 | 147   | 63.9           | 366 d     | 63.9±14.2  | N/A             | N/A               | 100                  | 23.8           | N/A    | N/A    | N/A   |
| Faris R. <sup>14</sup>          | 2002 | 337   | 73.6           | 43 m      | 53.2±15    | 68.2            | 31.8              | 0                    | N/A            | N/A    | N/A    | N/A   |
| Fattouch K. <sup>15</sup>       | 2010 | 530   | 57.3           | 30 m      | 64.3±9     | 75.7            | 24.3              | 100                  | N/A            | N/A    | N/A    | 3.2   |
| Feinberg MS. <sup>16</sup>      | 2000 | 417   | 77.9           | 1 y       | 61.6±12    | N/A             | N/A               | 100                  | 21.8           | N/A    | N/A    | N/A   |
| Garcia-Cosio MD. <sup>17</sup>  | 2017 | 1526  | 78.0           | 3.4 y     | N/A        | 43.0            | 57.0              | 57.0                 | N/A            | N/A    | N/A    | N/A   |
| Grayburn PA. <sup>18</sup>      | 2005 | 336   | 81.0           | 42 m      | 60.5±12.5  | 0               | 100               | 56.5                 | N/A            | N/A    | N/A    | N/A   |
| Grigioni F. <sup>19</sup>       | 2001 | 303   | 72.9           | 5 y       | 70.6±10    | 57.1            | 42.9              | 100                  | N/A            | N/A    | N/A    | 11.6  |
| Grigioni F. <sup>20</sup>       | 2005 | 173   | 78.7           | 5 y       | 69.7±10    | N/A             | N/A               | 100                  | N/A            | N/A    | N/A    | 10.4  |
| Hickey M. <sup>21</sup>         | 1988 | 11848 | N/A            | 6.5 y     | N/A        | N/A             | N/A               | 100                  | N/A            | N/A    | N/A    | N/A   |
| Hillis GS. <sup>22</sup>        | 2005 | 737   | 61.0           | 5 y       | 72 (61-80) | N/A             | N/A               | 100                  | 22.0           | N/A    | N/A    | N/A   |
| Kajimoto K. (pEF) <sup>23</sup> | 2016 | 1825  | 53.8           | 530 d     | 74.4±13.1  | 94.7            | 3.9               | 33.9                 | N/A            | N/A    | N/A    | 30.7  |
| Kajimoto K. (rEF) <sup>23</sup> | 2016 | 1532  | 72.1           | 530 d     | 67.5±14.6  | 92.5            | 5.7               | 42.6                 | N/A            | N/A    | N/A    | 23.8  |
| Karatolios K. <sup>24</sup>     | 2015 | 206   | 76.0           | 55.6 m    | 52.1±12.6  | 49.0            | 51.0              | 0                    | N/A            | N/A    | N/A    | N/A   |
| Koelling T. <sup>25</sup>       | 2002 | 1421  | 67.7           | 369 d     | 61.7±14.7  | N/A             | N/A               | 59.3                 | N/A            | 13.6   | N/A    | 10.7  |
| Lamas G. <sup>26</sup>          | 1997 | 727   | 83.0           | 3.5 y     | 57±10      | N/A             | N/A               | 100                  | N/A            | N/A    | N/A    | N/A   |
| Lancellotti P. <sup>27</sup>    | 2005 | 161   | 66.5           | 35 m      | 65±11      | N/A             | N/A               | 100                  | N/A            | N/A    | N/A    | N/A   |
| Lehmann KG. <sup>28</sup>       | 1992 | 206   | 82.5           | 1 y       | 57.6       | N/A             | N/A               | 100                  | N/A            | N/A    | N/A    | N/A   |
| Lopez-Perez M. <sup>29</sup>    | 2014 | 1036  | 80.0           | 2.8 y     | 61.9±13    | N/A             | N/A               | 100                  | 7.3            | N/A    | N/A    | N/A   |
| MacHaalany J. <sup>30</sup>     | 2014 | 174   | 79             | 366 d     | 63±12      | N/A             | N/A               | 100                  | 10             | N/A    | N/A    | N/A   |
| Mentias A. <sup>31</sup>        | 2017 | 4005  | 55.6           | 5.9 y     | 61.9±13    | N/A             | N/A               | 100                  | 39             | N/A    | N/A    | N/A   |
| Naser N. <sup>32</sup>          | 2016 | 138   | 61             | 5 y       | 62±9       | N/A             | N/A               | 100                  | N/A            | N/A    | N/A    | 25    |
| Neskovic AN. <sup>33</sup>      | 1999 | 131   | 72.5           | 32 m      | 55±9       | N/A             | N/A               | 100                  | N/A            | N/A    | N/A    | N/A   |
| Nunez-Gil I. <sup>34</sup>      | 2013 | 237   | 73.8           | 6.95 y    | 66.1±12.9  | N/A             | N/A               | 100                  | 20.7           | N/A    | N/A    | 22.4  |
| Pastorius CA. <sup>35</sup>     | 2007 | 711   | 61.7           | 5 y       | 63.9±11.5  | N/A             | N/A               | 100                  | 47.3           | N/A    | N/A    | N/A   |
| Patel J. <sup>36</sup>          | 2003 | 558   | 76.5           | 5 y       | 68.8±10.7  | N/A             | 22.4              | 55.5                 | N/A            | N/A    | N/A    | 23.5  |
| Pellizzon GG. <sup>37</sup>     | 2004 | 1976  | 62.8           | 1 y       | 59.2       | N/A             | N/A               | 100                  | 13.3           | N/A    | N/A    | N/A   |
| Perez de Isla L. <sup>38</sup>  | 2007 | 279   | 71.7           | 418 d     | 66.3±13.2  | N/A             | N/A               | 100                  | N/A            | N/A    | N/A    | 21.9  |
| Persson A. <sup>39</sup>        | 2010 | 725   | 71             | 98 m      | 65±10      | N/A             | N/A               | 100                  | 20             | N/A    | N/A    | N/A   |

|                            |                   |      |      |        |                 |      |      |      |      |     |     |      |
|----------------------------|-------------------|------|------|--------|-----------------|------|------|------|------|-----|-----|------|
| Rihal C. <sup>40</sup>     | 1994              | 102  | 63.7 | 36 m   | 61±14           | 56.8 | 43.2 | 0    | N/A  | N/A | N/A | 18.6 |
| Rossi A. <sup>41</sup>     | 2011              | 1256 | 78.7 | 2.7 y  | 67±11           | 64   | 36   | 57.7 | N/A  | N/A | N/A | N/A  |
| Tcheng JE. <sup>42</sup>   | 1992              | 1480 | 67.3 | 3 y    | 57.3            | N/A  | N/A  | 100  | 18.3 | N/A | N/A | N/A  |
| Trichon B. <sup>43</sup>   | 2003              | 2057 | 60   | 5 y    | 61.6            | 24.9 | 75.1 | 59   | 35.2 | N/A | N/A | N/A  |
| Uddin AM. <sup>44</sup>    | 2012              | 888  | 68.7 | 3.1 y  | 62.9±13.2       | N/A  | N/A  | 100  | 17.3 | N/A | N/A | N/A  |
| Upadhyay GA. <sup>45</sup> | 2015              | 439  | 79.5 | 3 y    | 70.2(61.1-78.2) | N/A  | N/A  | 58.1 | N/A  | N/A | N/A | 48   |
| Kaneko H. <sup>46</sup>    | 2014 <sup>1</sup> | 1701 | 76.5 | 1123 d | 64.8±12.5       | 49.4 | 50.6 | 0    | 15.6 | N/A | N/A | 25.8 |
| Kwon DH. <sup>47</sup>     | 2016              | 336  | 80   | 54 m   | 62±11           | N/A  | N/A  | 100  | N/A  | N/A | N/A | N/A  |
| Mallidi HR. <sup>48</sup>  | 2003              | 489  | 65.8 | 3.4 y  | 65.3±10         | 55.5 | 44.5 | 100  | N/A  | N/A | N/A | N/A  |
| Di Mauro M. <sup>49</sup>  | 2006              | 239  | 96.4 | 62 m   | 63.9±9.9        | N/A  | N/A  | 100  | 92.9 | N/A | N/A | N/A  |
| Okura H. <sup>50</sup>     | 2008              | 524  | 68.9 | 615 d  | 68.6±11         | N/A  | N/A  | 100  | 29.3 | N/A | N/A | 17   |
| Stolfo D. <sup>51</sup>    | 2015              | 470  | 70   | 6 m    | 45±14           | 74   | 26   | 0    | N/A  | N/A | N/A | N/A  |
| Verheart D. <sup>52</sup>  | 2012              | 266  | 69   | 3.6 y  | 64.2±11.8       | 10   | 90   | 51   | N/A  | 93  | N/A | N/A  |
| Yalonsky S. <sup>53</sup>  | 2014              | 179  | 61   | 4.1 y  | 62.9±10.5       | N/A  | N/A  | 100  | 22.5 | N/A | N/A | N/A  |

| LVEF, %   | LVEDD, mm | LVESD, mm | LA, mm    | EDV, ml    | ESV, ml    | Sphericity index | EROA, PISA (cm <sup>2</sup> ) | EROA, Doppler (cm <sup>2</sup> ) | Reg Volume, ml | Reg Fraction, % | VCW, cm  | Mitral Decel Time, msec |
|-----------|-----------|-----------|-----------|------------|------------|------------------|-------------------------------|----------------------------------|----------------|-----------------|----------|-------------------------|
| 47±9      | N/A       | N/A       | N/A       | 53.3±15.5* | 28.5±10.9* | N/A              | N/A                           | N/A                              | N/A            | N/A             | N/A      | 212±74                  |
| 34.4±10.8 | N/A       | N/A       | N/A       | 181±65     | 121±54     | N/A              | N/A                           | N/A                              | N/A            | N/A             | N/A      | 184±83.3                |
| 33±9      | N/A       | N/A       | N/A       | N/A        | N/A        | N/A              | N/A                           | N/A                              | N/A            | N/A             | N/A      | N/A                     |
| 47±12     | N/A       | N/A       | N/A       | N/A        | N/A        | N/A              | N/A                           | N/A                              | N/A            | N/A             | N/A      | N/A                     |
| N/A       | 54.6±7.7  | 38.2±8.6  | 38.6±10.2 | N/A        | N/A        | N/A              | N/A                           | N/A                              | N/A            | N/A             | N/A      | N/A                     |
| 26±7      | N/A       | N/A       | N/A       | 223.1±88   | 151.1±81.5 | N/A              | N/A                           | N/A                              | N/A            | N/A             | N/A      | N/A                     |
| 31±10     | N/A       | N/A       | 49±8      | 116±45*    | 82±38*     | N/A              | N/A                           | N/A                              | N/A            | N/A             | N/A      | 193±84                  |
| 46.4±14   | N/A       | N/A       | N/A       | N/A        | N/A        | N/A              | N/A                           | N/A                              | N/A            | N/A             | N/A      | 205.8±56                |
| 29.7±7.9  | 68.4±9    | N/A       | 46.5±7    | N/A        | N/A        | N/A              | N/A                           | N/A                              | N/A            | N/A             | N/A      | N/A                     |
| 59.3±18   | 47.6±10.1 | 32.3±8.8  | N/A       | N/A        | N/A        | N/A              | N/A                           | N/A                              | N/A            | N/A             | N/A      | N/A                     |
| 29.4±7    | N/A       | N/A       | N/A       | 98.6±36*   | N/A        | N/A              | N/A                           | N/A                              | N/A            | N/A             | N/A      | N/A                     |
| 54±12     | N/A       | N/A       | N/A       | N/A        | N/A        | N/A              | N/A                           | N/A                              | N/A            | N/A             | N/A      | N/A                     |
| N/A       | N/A       | N/A       | N/A       | N/A        | N/A        | N/A              | N/A                           | N/A                              | N/A            | N/A             | N/A      | N/A                     |
| N/A       | 66.7±9    | 55.9±11   | N/A       | N/A        | N/A        | N/A              | N/A                           | N/A                              | N/A            | N/A             | N/A      | 101.7±27                |
| 43±10     | 57.7±7    | 47.3±4    | 25.7±7    | N/A        | N/A        | N/A              | N/A                           | N/A                              | N/A            | N/A             | N/A      | N/A                     |
| 42.5±10.2 | 50.3±6    | 34.2±8    | 37.3±4    | 122.9±45.7 | 69.4±36.3  | N/A              | N/A                           | N/A                              | N/A            | N/A             | N/A      | N/A                     |
| N/A       | N/A       | N/A       | N/A       | N/A        | N/A        | N/A              | N/A                           | N/A                              | N/A            | N/A             | N/A      | N/A                     |
| 24±10     | 66±9      | 59±10     | 45±7      | 114±39     | 87±36      | 0.3±0.1          | 0.15±0.1                      | 0.06±0.1                         | N/A            | 0.1±0.45        | 0.35±0.1 | 165±68                  |

|                   |                   |                |                  |                    |                   |               |               |               |             |              |                |                      |
|-------------------|-------------------|----------------|------------------|--------------------|-------------------|---------------|---------------|---------------|-------------|--------------|----------------|----------------------|
| 33.3<br>±13       | 32.5±<br>5*       | 27.3±6<br>*    | 25.<br>2±<br>5*  | N/A                | N/A               | N/A           | N/A           | N/A           | N/A         | N/A          | N/A            | 189.1<br>±61         |
| 36.6<br>±13       | 31.8±<br>5*       | 26.2±<br>6*    | 45.<br>9±7       | N/A                | N/A               | N/A           | N/A           | 0.11±<br>0.06 | 21.2±<br>12 | N/A          | N/A            | 198.6<br>±50         |
| N/A               | N/A               | N/A            | N/A              | N/A                | N/A               | N/A           | N/A           | N/A           | N/A         | N/A          | N/A            | N/A                  |
| 48<br>(37-<br>58) | 51<br>(48-<br>55) | 35 (31-<br>40) | N/A              | N/A                | N/A               | N/A           | N/A           | N/A           | N/A         | N/A          | N/A            | 192<br>(165-<br>225) |
| 57.3<br>±<br>10.8 | 49.8±<br>8.5      | 34.4±<br>8.5   | 43.<br>4±<br>8.8 | N/A                | N/A               | N/A           | N/A           | N/A           | N/A         | N/A          | N/A            | N/A                  |
| 29.2<br>±7.6      | 61.2±<br>9.6      | 52.3±<br>10.1  | 44.<br>8±<br>8.4 | N/A                | N/A               | N/A           | N/A           | N/A           | N/A         | N/A          | N/A            | N/A                  |
| 30.1<br>±8.4      | 68.2±<br>7.7      | N/A            | N/A              | N/A                | N/A               | N/A           | N/A           | N/A           | N/A         | N/A          | N/A            | N/A                  |
| 20.0<br>±5.0      | 63.0±<br>10.0     | N/A            | 47±<br>9         | N/A                | N/A               | N/A           | N/A           | N/A           | N/A         | N/A          | N/A            | N/A                  |
| 32.0<br>±7.0      | N/A               | N/A            | N/A              | N/A                | N/A               | N/A           | N/A           | N/A           | N/A         | N/A          | N/A            | N/A                  |
| 36±7              | N/A               | N/A            | N/A              | 144±<br>30*        | 93±25*            | N/A           | 0.17±<br>9    | N/A           | N/A         | N/A          | N/A            | 178±<br>51           |
| 49.4<br>±<br>10.5 | N/A               | N/A            | N/A              | 70.9±<br>18*       | 36.4±12*          | N/A           | N/A           | N/A           | N/A         | N/A          | N/A            | N/A                  |
| 53.9<br>±11       | 48.9±6            | 33.6±7         | N/A              | N/A                | N/A               | N/A           | N/A           | N/A           | N/A         | N/A          | N/A            | N/A                  |
| 46±<br>12         | 47±6              | 35±7           | N/A              | 102±35             | 57±29             | 0.55±0.7      | N/A           | N/A           | N/A         | N/A          | 0 (0-<br>0.23) | N/A                  |
| 45.2<br>±13       | 46.5±8            | 31.7±9         | 37.<br>7±        | N/A                | N/A               | N/A           | N/A           | N/A           | N/A         | N/A          | N/A            | N/A                  |
| 41±<br>12         | 53.8±<br>4.8      | 33.5±<br>6.4   | 44.<br>2±<br>4.3 | N/A                | N/A               | 0.56±0.7      | 0.22±<br>0.16 | N/A           | 42±21       | 0.48±<br>0.1 | N/A            | N/A                  |
| 45.5<br>±11       | N/A               | N/A            | 32.<br>4±<br>3.5 | 61.9±<br>12*       | 34.9±13*          | 0.37±<br>0.08 | N/A           | N/A           | N/A         | N/A          | N/A            | N/A                  |
| 57.7<br>±15       | 47.9±7            | 31.8±<br>8.4   | 38.<br>3±<br>9.6 | 74.9(54-<br>104.5) | 33.4<br>(21.2-51) | N/A           | N/A           | N/A           | N/A         | N/A          | N/A            | N/A                  |
| 54.1<br>±<br>12.5 | 48.5±<br>8.5      | 34.0±<br>7.6   | N/A              | N/A                | N/A               | N/A           | N/A           | N/A           | N/A         | N/A          | N/A            | N/A                  |
| 21.7<br>±7.5      | 65.7±<br>10       | 56.7±1<br>1    | 50.<br>9±8       | N/A                | N/A               | N/A           | 0.25±<br>0.1  | N/A           | 28.7±<br>12 | N/A          | N/A            | 159.8<br>±41.5       |
| N/A               | N/A               | N/A            | N/A              | N/A                | N/A               | N/A           | N/A           | N/A           | N/A         | N/A          | N/A            | N/A                  |
| 55.7<br>±16       | 49.5±9            | 31.3±<br>8.9   | 52±<br>9.1       | N/A                | N/A               | N/A           | N/A           | N/A           | N/A         | N/A          | N/A            | N/A                  |
| N/A               | N/A               | N/A            | N/A              | N/A                | N/A               | N/A           | N/A           | N/A           | N/A         | N/A          | N/A            | N/A                  |
| 23±8              | 69±9              | 60±9           | N/A              | N/A                | N/A               | N/A           | N/A           | N/A           | N/A         | N/A          | N/A            | 172±<br>66           |
| 32±8              | 63.1±8            | 53.4±<br>12    | N/A              | N/A                | N/A               | N/A           | N/A           | N/A           | N/A         | N/A          | N/A            | 166.5<br>±65         |
| 45.4              | N/A               | N/A            | N/A              | N/A                | N/A               | N/A           | N/A           | N/A           | N/A         | N/A          | N/A            | N/A                  |
| 26.3              | N/A               | N/A            | N/A              | N/A                | N/A               | N/A           | N/A           | N/A           | N/A         | N/A          | N/A            | N/A                  |
| 48.3<br>±<br>11.6 | N/A               | N/A            | N/A              | N/A                | N/A               | N/A           | N/A           | N/A           | N/A         | N/A          | N/A            | N/A                  |
| 25±8              | 62±9              | 54±10          | 46±<br>8         | N/A                | N/A               | N/A           | N/A           | N/A           | N/A         | N/A          | N/A            | N/A                  |
| 56.8<br>±         | 49.8±<br>9.1      | 33.1±<br>11.4  | N/A              | N/A                | N/A               | N/A           | N/A           | N/A           | N/A         | N/A          | N/A            | N/A                  |

|                   |            |        |                  |               |           |      |               |     |     |     |     |                |
|-------------------|------------|--------|------------------|---------------|-----------|------|---------------|-----|-----|-----|-----|----------------|
| 15.4              |            |        |                  |               |           |      |               |     |     |     |     |                |
| 26.7<br>±<br>11.6 | N/A        | N/A    | N/A              | N/A           | N/A       | N/A  | 0.12±<br>0.11 | N/A | N/A | N/A | N/A | N/A            |
| N/A               | N/A        | N/A    | N/A              | N/A           | N/A       | N/A  | N/A           | N/A | N/A | N/A | N/A | N/A            |
| 26.7<br>±3.9      | N/A        | N/A    | N/A              | 118.5±<br>27* | 85±28*    | N/A  | N/A           | N/A | N/A | N/A | N/A | N/A            |
| 54.8<br>±<br>13.7 | N/A        | N/A    | 39.<br>1±<br>7.5 | 88.7±<br>38.2 | 42.6±31.8 | N/A  | N/A           | N/A | N/A | N/A | N/A | 208.7<br>±69.5 |
| 30±<br>10         | 36±<br>17* | 30±13* | N/A              | 101±<br>38*   | 73±34*    | N/A  | N/A           | N/A | N/A | N/A | N/A | N/A            |
| 25±9              | N/A        | N/A    | N/A              | N/A           | 94±40     | N/A  | N/A           | N/A | N/A | N/A | N/A | N/A            |
| N/A               | N/A        | N/A    | 40.<br>5±5       | N/A           | N/A       | 2.01 | N/A           | N/A | N/A | N/A | N/A | N/A            |

**Abbreviation list. BMI: body mass index; MI: myocardial infarction; CKD: chronic kidney disease; COPD: chronic obstructive pulmonary disease; ICD: implantable cardioverter-defibrillator; AF: atrial fibrillation; CRT: cardiac resynchronization therapy; LVEF: left ventricle ejection fraction; LVEDD: left ventricle end-diastolic diameter; LVESD: left ventricle end-systolic diameter; LA: left atrium; EDV: end-diastolic volume; ESV: end-systolic volume; EROA: effective regurgitant orifice area; VCW: vena contracta width. \*refers to measures indexed for body surface area.**

**eTable 2.** Data Extraction and Relative Adjustment for the Primary Outcome (All-Cause Mortality)

| Authors, Ref <sup>#</sup>      | All-cause mortality (SMR yes/no) |                         | All-cause mortality (Qualitative SMR assessment) |                         | All-cause mortality (Quantitative SMR assessment) |                         |
|--------------------------------|----------------------------------|-------------------------|--------------------------------------------------|-------------------------|---------------------------------------------------|-------------------------|
| Abate E. <sup>1</sup>          | -                                | -                       | -                                                | -                       | 6.59 [4.09-10.61]                                 | Adjusted (Multivariate) |
| Agricola E. <sup>2</sup>       | -                                | -                       | -                                                | -                       | 50% vs 36%                                        | Unadjusted              |
| Agricola E. <sup>3</sup>       | 48.4% vs 28.5%                   | Unadjusted              | -                                                | -                       | 2.1 [1.2-3.6]                                     | Adjusted (Multivariate) |
| Aronson D. <sup>4</sup>        | 16.2% vs 6.5%                    | Unadjusted              | 2.0 [1.2-3.4]                                    | Adjusted (Multivariate) | -                                                 | -                       |
| Barra S. <sup>5</sup>          | 1.42 [1.028-1.957]               | Adjusted (Multivariate) | 38.5%, 37.5%, 21.7% vs 12.0%                     | Unadjusted              | -                                                 | -                       |
| Boriani G. <sup>6</sup>        | -                                | -                       | 0.9 [0.5-1.5]                                    | Unadjusted              | -                                                 | -                       |
| Bruch C. <sup>7</sup>          | -                                | -                       | -                                                | -                       | 2.42 [1.43-4.13]                                  | Adjusted (Multivariate) |
| Bursi F. <sup>8</sup>          | -                                | -                       | 1.55 [1.08-2.22]                                 | Adjusted (Multivariate) | -                                                 | -                       |
| Calafiore AM. <sup>10</sup>    | 1.03 [0.81-1.31]                 | Adjusted (Multivariate) | -                                                | -                       | -                                                 | -                       |
| Cioffi F. <sup>11</sup>        | -                                | -                       | 4.47 [1.54-13.01]                                | Adjusted (Multivariate) | -                                                 | -                       |
| Di Mauro M. <sup>49</sup>      | -                                | -                       | 2.2 [1.11-4.34]                                  | Adjusted (Multivariate) | -                                                 | -                       |
| Ellis S. <sup>12</sup>         | -                                | -                       | 31.4%, 25.4%, 15.4% vs 7.7%                      | Unadjusted              | -                                                 | -                       |
| Engstrom AE. <sup>13</sup>     | 1.71 [1.02-2.87]                 | Adjusted (Multivariate) | 57.9%, 30.0%, 22.6% vs 7.7%                      | Unadjusted              | -                                                 | -                       |
| Faris R. <sup>14</sup>         | 1.8 [1.1-3.2]                    | Adjusted (Multivariate) | -                                                | -                       | -                                                 | -                       |
| Fattouch K. <sup>15</sup>      | -                                | -                       | -                                                | -                       | 2.7 [1.5-4.8]                                     | Adjusted (Multivariate) |
| Feinberg MS. <sup>16</sup>     | -                                | -                       | 2.31 [1.03-5.20]                                 | Adjusted (Multivariate) | -                                                 | -                       |
|                                |                                  |                         | 2.85 [0.95-8.51]                                 | Adjusted (Multivariate) |                                                   |                         |
| Garcia-Cosio MD. <sup>17</sup> | -                                | -                       | 1.54 [1.14-2.08]                                 | Adjusted (Multivariate) | -                                                 | -                       |
| Grigioni F. <sup>19</sup>      | 1.88 [1.23-2.86]                 | Adjusted (Multivariate) | -                                                | -                       | 2.23 [1.31-3.79] (EROA)                           | Adjusted (Multivariate) |

|                              |                   |                         |                     |                         | 2.05 [1.30-3.23](RegV)                         | Adjusted (Multivariate)  |
|------------------------------|-------------------|-------------------------|---------------------|-------------------------|------------------------------------------------|--------------------------|
| Hickey M. <sup>21</sup>      | $\chi^2$ 9        | Adjusted (Multivariate) | -                   | -                       | -                                              | -                        |
| Hillis GS. <sup>22</sup>     | -                 | -                       | 0.98 [0.66-1.44]    | Adjusted (Multivariate) | -                                              | -                        |
|                              |                   |                         | 1.06 [0.64-1.76]    | Adjusted (Multivariate) |                                                |                          |
|                              |                   |                         | 1.62 [0.80-3.28]    | Adjusted (Multivariate) |                                                |                          |
| Kaneko H. <sup>46</sup>      | -                 | -                       | 2.179 [1.266-3.751] | Adjusted (Multivariate) | -                                              | -                        |
| Koelling T. <sup>25</sup>    | -                 | -                       | 1.845 [1.429-2.382] | Adjusted (Multivariate) | -                                              | -                        |
| Lehmann KG. <sup>28</sup>    | 3.7 [1.1-12.1]    | Adjusted (Multivariate) | -                   | -                       | -                                              | -                        |
| Lopez-Perez M. <sup>29</sup> | -                 | -                       | 3.1 [1.34-7.2]      | Adjusted (Multivariate) | -                                              | -                        |
| MacHaalany J. <sup>30</sup>  | 2.5% vs 0%        | Unadjusted              | 5.2%, 1.6% vs 0%    | Unadjusted              | -                                              | -                        |
| Mallidi HR. <sup>48</sup>    | 0.958 [0.73-1.27] | Adjusted (Multivariate) | -                   | -                       | -                                              | -                        |
| Mentias A. <sup>31</sup>     | -                 | -                       | 1.28 [1.07-1.52]    | Adjusted (Multivariate) | -                                              | -                        |
|                              |                   |                         | 2.35 [1.80-3.08]    | Adjusted (Multivariate) |                                                |                          |
|                              |                   |                         | 2.54-1.62-3.97]     | Adjusted (Multivariate) |                                                |                          |
| Naser N. <sup>32</sup>       | -                 | -                       | -                   | -                       | 54.2% vs 27.2% (EROA)<br>57.1% vs 29.1% (RegV) | Unadjusted<br>Unadjusted |
| Neskovic AN. <sup>33</sup>   | 14% vs 6%         | Unadjusted              | -                   | -                       | -                                              | -                        |
| Okura H. <sup>50</sup>       | -                 | -                       | 27.6% vs 10.1%      | Unadjusted              | -                                              | -                        |
| Pastorius CA. <sup>35</sup>  | 1.57 [1.20-2.05]  | Adjusted (Multivariate) | -                   | -                       | -                                              | -                        |
| Patel J. <sup>36</sup>       | -                 | -                       | -                   | -                       | $\chi^2$ 0.47                                  | Unadjusted               |
| Pellizzon GG. <sup>37</sup>  | 4.8% vs 1.4%      | Unadjusted              | -                   | -                       | -                                              | -                        |
| Persson A. <sup>39</sup>     | -                 | -                       | 1.53 [1.06-2.19]    | Adjusted (Multivariate) | -                                              | -                        |

|                                    |                            |                            |                                                |                                                          |                                                    |                                                          |
|------------------------------------|----------------------------|----------------------------|------------------------------------------------|----------------------------------------------------------|----------------------------------------------------|----------------------------------------------------------|
| <b>Rihal C.</b> <sup>40</sup>      | -                          | -                          | 1.30<br>[0.67-<br>2.53]                        | Adjusted<br>(Multivariate)                               | -                                                  | -                                                        |
| <b>Rossi A.</b> <sup>41</sup>      | -                          | -                          | -                                              | -                                                        | 1.8 [1.3-2.6]<br>(EROA)<br>2.0 [1.3-2.6]<br>(RegV) | Adjusted<br>(Multivariate)<br>Adjusted<br>(Multivariate) |
| <b>Tcheng JE.</b> <sup>42</sup>    | 1.48 [1.21-<br>1.83]       | Adjusted<br>(Multivariate) | -                                              | -                                                        | -                                                  | -                                                        |
| <b>Trichon B.</b> <sup>43</sup>    | 1.234<br>[1.134-<br>1.343] | Adjusted<br>(Multivariate) | -                                              | -                                                        | -                                                  | -                                                        |
| <b>Uddin AM.</b> <sup>44</sup>     | -                          | -                          | 1.10 [0.7-<br>1.73]<br>1.27<br>[0.72-<br>2.17] | Adjusted<br>(Multivariate)<br>Adjusted<br>(Multivariate) | -                                                  | -                                                        |
| <b>Upadhyay GA.</b> <sup>45</sup>  | 1.329<br>[1.011-<br>1.748] | Adjusted<br>(Multivariate) | -                                              | -                                                        | -                                                  | -                                                        |
| <b>Yalonetsky S.</b> <sup>53</sup> | -                          | -                          | 3.57<br>[1.62-<br>7.84]                        | Adjusted<br>(Multivariate)                               | -                                                  | -                                                        |

Abbreviation list. SMR, functional mitral regurgitation .



**eTable 3.** Values of LVEF and LVESV According to SMR Grade in the Included Studies

| Author, Ref #                   | LVEF, %        |            |                     |         | LVESVi, ml or LVESV, ml |                  |                     |         |
|---------------------------------|----------------|------------|---------------------|---------|-------------------------|------------------|---------------------|---------|
|                                 | None/trace SMR | Mild SMR   | Moderate/severe SMR | P value | None/trace SMR          | Mild SMR         | Moderate/severe SMR | P value |
| Abate E. <sup>1</sup>           | -              | 47±9       | 43±10               | <0.001  | -                       | 32.9±14.6        | 28.1±10.4           | <0.001  |
| Agricola E. <sup>2</sup>        | -              | -          | -                   | -       | -                       | -                | -                   | -       |
| Agricola E. <sup>3</sup>        | -              | -          | -                   | -       | -                       | -                | -                   | -       |
| Aronson D. <sup>4</sup>         | 47±12          | 43±12      | 39±11               | <0.001  | -                       | -                | -                   | -       |
| Barra S. <sup>5</sup>           | -              | -          | -                   | -       | -                       | -                | -                   | -       |
| Boriani G. <sup>6</sup>         | -              | 26±7       | 26±7                | 0.602   | -                       | 153±84           | 150±79              | 0.802   |
| Bruch C. <sup>7</sup>           | -              | 31±10      | 29±9*               | 0.102   | -                       | 79±35            | 91±45*              | 0.026   |
| Bursi F. <sup>8</sup>           | 49±13          | 45±14      | 40±15               | <0.001  | -                       | -                | -                   | -       |
| Bursi F. <sup>9</sup>           | 32.2±7.8       | 29.7±7.9   | 27.1±7.2            | 0.001   | -                       | -                | -                   | -       |
| Calafiore AM. <sup>10</sup>     | 59.4±11.7      | 59.2±12.7  |                     | 0.600   | -                       | -                | -                   | -       |
| Cioffi F. <sup>11</sup>         | 30±7           |            | 27±6                | 0.04    | -                       | -                | -                   | -       |
| Ellis S. <sup>12</sup>          | 56±11          | 48±14      | 42±15               | <0.001  | -                       | -                | -                   | -       |
| Engstrom AE. <sup>13</sup>      | -              | -          | -                   | -       | -                       | -                | -                   | -       |
| Faris R. <sup>14</sup>          | -              | -          | -                   | -       | -                       | -                | -                   | -       |
| Fattouch K. <sup>15</sup>       | 43±8           |            | 43±12               | 0.21    | -                       | -                | -                   | -       |
| Feinberg MS. <sup>16</sup>      | 44±13          | 45±9       | 43±10               | 0.61    | 70±29                   | 66±28            | 79±52               | 0.18    |
| Garcia-Cosio MD. <sup>17</sup>  | -              | -          | -                   | -       | -                       | -                | -                   | -       |
| Grayburn PA. <sup>18</sup>      | -              | -          | -                   | -       | -                       | -                | -                   | -       |
| Grigioni F. <sup>19</sup>       | 34±11          | 33±14      |                     | 0.14    | -                       | -                | -                   | -       |
| Grigioni F. <sup>20</sup>       | 36±11          | 37±14      |                     | 0.92    | -                       | -                | -                   | -       |
| Hickey M. <sup>21</sup>         | -              | -          | -                   | -       | -                       | -                | -                   | -       |
| Hillis GS. <sup>22</sup>        | 55 (48-60)     | 50 (38-58) | 35 (27-53)          | <0.001  | -                       | -                | -                   | -       |
| Kajimoto K. (pEF) <sup>23</sup> | 58.4±10.7      | 57.2±10.6  | 56.0±11.2           | 0.005   | -                       | -                | -                   | -       |
| Kajimoto K. (rEF) <sup>23</sup> | 30.4±7.4       | 29.1±7.7   | 28.6±7.4            | 0.011   | -                       | -                | -                   | -       |
| Karatolios K. <sup>24</sup>     | -              | -          | -                   | -       | -                       | -                | -                   | -       |
| Koelling T. <sup>25</sup>       | 21±5           | 20±5       | 19±5                | 0.001   | -                       | -                | -                   | -       |
| Lamas G. <sup>26</sup>          | 32±7           | 31±7       |                     | 0.471   | 120±47                  | 148±65           |                     | <0.001  |
| Lancellotti P. <sup>27</sup>    | -              | -          | -                   | -       | -                       | -                | -                   | -       |
| Lehmann KG. <sup>28</sup>       | 50.2±10.1      | 44.5±7.3   | 44.0±11.4           | <0.01   | 36±12                   | 39±11            | 41±12               | ns      |
| Lopez-Perez M. <sup>29</sup>    | 57±10          | 53±11      | 46±14               | <0.001  | -                       | -                | -                   | -       |
| MacHaalany J. <sup>30</sup>     | 48±1           | 45±2       | 41±3                | 0.03    | 53±3                    | 59±4             | 66±7                | 0.16    |
| Mentias A. <sup>31</sup>        | 46±12          | 43±13      | 40±14               | <0.001  | -                       | -                | -                   | -       |
| Naser N. <sup>32</sup>          | -              | -          | -                   | -       | -                       | -                | -                   | -       |
| Neskovic AN. <sup>33</sup>      | 47±11          | 43±11      |                     | ns      | 33.12                   | 38±13            |                     | <0.05   |
| Nunez-Gil I. <sup>34</sup>      | 59.3±17.0      | 51.1±14.7  |                     | 0.05    | 31.0 (21.2-44.0)        | 37.0 (21.5-51.0) |                     | 0.25    |
| Pastorius CA. <sup>35</sup>     | 57.4±9.6       | 51.0±11    | 45±14.5             | <0.001  | -                       | -                | -                   | -       |
| Patel J. <sup>36</sup>          | 24±8           | 23±9       | 19±6                | <0.001  | -                       | -                | -                   | -       |
| Pellizzon GG. <sup>37</sup>     | 58 (49-65)     | 53 (39-59) | 51 (45-68)          | 0.0004  | -                       | -                | -                   | -       |
| Perez de Isla L. <sup>38</sup>  | 58.5±17.6      | 51.1±15.5  |                     | 0.001   | -                       | -                | -                   | -       |
| Persson A. <sup>39</sup>        | -              | -          | -                   | -       | -                       | -                | -                   | -       |
| Rihal C. <sup>40</sup>          | -              | -          | -                   | -       | -                       | -                | -                   | -       |

|                             |            |            |            |         |           |       |           |         |
|-----------------------------|------------|------------|------------|---------|-----------|-------|-----------|---------|
| Rossi A. <sup>41</sup>      | 34±8       | 33±8       | 29±8       | <0.0001 | -         | -     | -         | -       |
| Tcheng JE. <sup>42</sup>    | 47 (40-54) | 39 (33-49) | 35 (29-44) | <0.001  | -         | -     | -         | -       |
| Trichon B. <sup>43</sup>    | 28 (22-34) | 25 (19-32) | 25 (20-33) | 0.001   | -         | -     | -         | -       |
| Uddin AM. <sup>44</sup>     | 50±11      | 47±12      | 44±14      | <0.0001 | -         | -     | -         | -       |
| Upadhyay GA. <sup>45</sup>  | -          | -          | -          | -       | -         | -     | -         | -       |
| Kaneko H. <sup>46</sup>     | 58.6±16.8  | 28.6±14.0  |            | <0.001  | -         | -     | -         | -       |
| Kwon DH. <sup>47</sup>      | -          | -          | -          | -       | -         | -     | -         | -       |
| Mallidi HR. <sup>48</sup>   | -          | -          | -          | -       | -         | -     | -         | -       |
| Di Mauro M. <sup>49</sup>   | 26.5±3.7   |            | 26.8±4.1   | Ns      | 82±22     |       | 87±34     | ns      |
| Okura H. <sup>50</sup>      | 56.3±12.8  |            | 43.0±14.6  | <0.0001 | 39.0±25.6 |       | 71.5±37.9 | <0.0001 |
| Stolfo D. <sup>51</sup>     | 34±10      | 25±8       | 28±9       | <0.001  | 60±27     | 91±38 | 86±36     | <0.001  |
| Verheart D. <sup>52</sup>   | -          | -          | -          | -       | -         | -     | -         | -       |
| Yalonetsky S. <sup>53</sup> | -          | -          | -          | -       | -         | -     | -         | -       |

Abbreviation list. LVEF, left ventricle ejection fraction; LVESV, left ventricle end-systolic volume; SMR, secondary mitral regurgitation.

**eTable 4.** SMR Detection and Quantitation Methods Used in the Included Studies and Relative Study Population

| <b>Author, Ref<sup>#</sup></b>         | <b>MR quantitation method</b>              | <b>MR grading</b>                                 | <b>Study population</b>                  |
|----------------------------------------|--------------------------------------------|---------------------------------------------------|------------------------------------------|
| <b>Abate E.</b> <sup>1</sup>           | Echocardiography                           | VCW and PISA                                      | First STEMI                              |
| <b>Agricola E.</b> <sup>2</sup>        | Echocardiography                           | VCW and PISA                                      | Ischemic and non-ischemic LV dysfunction |
| <b>Agricola E.</b> <sup>3</sup>        | Echocardiography                           | VCW and PISA                                      | Non-ischemic LV dysfunction (EF<50%)     |
| <b>Aronson D.</b> <sup>4</sup>         | Echocardiography                           | Maximum regurgitant jet area                      | Acute MI                                 |
| <b>Barra S.</b> <sup>5</sup>           | Echocardiography                           | Maximum regurgitant jet area                      | First STEMI                              |
| <b>Boriani G.</b> <sup>6</sup>         | Echocardiography                           | Maximum regurgitant jet area                      | CHF                                      |
| <b>Bruch C.</b> <sup>7</sup>           | Echocardiography                           | EROA                                              | CHF                                      |
| <b>Bursi F.</b> <sup>8</sup>           | Echocardiography                           | maximum regurgitant jet area                      | >30 days after acute MI                  |
| <b>Bursi F.</b> <sup>9</sup>           | Echocardiography                           | maximum regurgitant jet area                      | CHF                                      |
| <b>Calafiore AM.</b> <sup>10</sup>     | Echocardiography                           | Maximum regurgitant jet area ,VCW and PISA        | Patients undergoing CABG                 |
| <b>Cioffi F.</b> <sup>11</sup>         | Echocardiography                           | Maximum regurgitant jet area                      | CHF with EF<40%                          |
| <b>Ellis S.</b> <sup>12</sup>          | Left ventriculography and echocardiography | MR present/absent<br>Maximum regurgitant jet area | Stable patients undergoing PCI           |
| <b>Engstrom AE.</b> <sup>13</sup>      | Echocardiography                           | Maximum regurgitant jet area and VCW              | First STEMI                              |
| <b>Faris R.</b> <sup>14</sup>          | Echocardiography                           | Maximum regurgitant jet area                      | Idiopathic DCM                           |
| <b>Fattouch K.</b> <sup>15</sup>       | Echocardiography                           | EROA                                              | Patients undergoing CABG                 |
| <b>Feinberg MS.</b> <sup>16</sup>      | Echocardiography                           | Maximum regurgitant jet area                      | First MI within 48 h of MI               |
| <b>Garcia-Cosio MD.</b> <sup>17</sup>  | Echocardiography                           | Maximum regurgitant jet area                      | Symptomatic CHF with EF<40%              |
| <b>Grayburn PA.</b> <sup>18</sup>      | Echocardiography                           | VCW and EROA                                      | Advanced CHF due to systolic dysfunction |
| <b>Grigioni F.</b> <sup>19</sup>       | Echocardiography                           | Reg Volume and EROA                               | History of Q-wave MI > 16 days           |
| <b>Grigioni F.</b> <sup>20</sup>       | Echocardiography                           | Reg Volume and EROA                               | History of Q-wave MI > 16 days           |
| <b>Hickey M.</b> <sup>21</sup>         | Left ventriculography                      | MR present/absent                                 | NSTEMI                                   |
| <b>Hillis GS.</b> <sup>22</sup>        | Echocardiography                           | Maximum regurgitant jet area ,VCW and PISA        | Acute MI                                 |
| <b>Kajimoto K. (pEF)</b> <sup>23</sup> | Echocardiography                           | Maximum regurgitant jet area                      | Acute decompensated HF- pEF              |
| <b>Kajimoto K. (rEF)</b> <sup>23</sup> | Echocardiography                           | Maximum regurgitant jet area                      | Acute decompensated HF- rEF              |
| <b>Karatolios K.</b> <sup>24</sup>     | Echocardiography                           | Visual                                            | non-ischemic DCM                         |
| <b>Koelling T.</b> <sup>25</sup>       | Echocardiography                           | Maximum regurgitant jet area                      | Advanced CHF with EF≤35%                 |
| <b>Lamas G.</b> <sup>26</sup>          | Left ventriculography                      | MR present/absent                                 | History of Q-wave MI < 16 days           |
| <b>Lancellotti P.</b> <sup>27</sup>    | Echocardiography                           | EROA                                              | Chronic ischemic LV dysfunction          |
| <b>Lehmann KG.</b> <sup>28</sup>       | Left ventriculography                      | MR present/absent                                 | First MI within 7 h of onset             |
| <b>Lopez-Perez M.</b> <sup>29</sup>    | Echocardiography                           | Maximum regurgitant jet                           | First STEMI                              |

|                                       |                                            |                                                   |                                       |
|---------------------------------------|--------------------------------------------|---------------------------------------------------|---------------------------------------|
| <b>MacHaalany J.</b> <sup>30</sup>    | Echocardiography                           | area<br>Maximum regurgitant jet area and VCW      | First STEMI                           |
| <b>Mentias A.</b> <sup>31</sup>       | Echocardiography                           | Maximum regurgitant jet area                      | First STEMI                           |
| <b>Naser N.</b> <sup>32</sup>         | Echocardiography                           | Reg Volume and EROA                               | History of Q-wave MI > 16 days        |
| <b>Neskovic AN.</b> <sup>33</sup>     | Echocardiography                           | Maximum regurgitant jet area                      | First STEMI                           |
| <b>Nunez-Gil I.</b> <sup>34</sup>     | Echocardiography                           | EROA                                              | NSTEMI                                |
| <b>Pastorius CA.</b> <sup>35</sup>    | Left ventriculography and echocardiography | MR present/absent<br>Maximum regurgitant jet area | Patients undergoing PCI for acute MI  |
| <b>Patel J.</b> <sup>36</sup>         | Echocardiography                           | PISA and continuity equation                      | Advanced CHF with EF≤35% and NYHA 3-4 |
| <b>Pellizzon GG.</b> <sup>37</sup>    | Left ventriculography                      | MR present/absent                                 | Patients undergoing PCI for acute MI  |
| <b>Perez de Isla L.</b> <sup>38</sup> | Echocardiography                           | EROA                                              | NSTEMI                                |
| <b>Persson A.</b> <sup>39</sup>       | Echocardiography                           | Color and continuous wave Doppler                 | Acute coronary syndromes              |
| <b>Rihal C.</b> <sup>40</sup>         | Echocardiography                           | Maximum regurgitant jet area                      | Idiopathic DCM                        |
| <b>Rossi A.</b> <sup>41</sup>         | Echocardiography                           | Reg Volume,EROA, VCW                              | Ischemic and idiopathic DCM           |
| <b>Tcheng JE.</b> <sup>42</sup>       | Left ventriculography                      | MR present/absent                                 | Acute MI                              |
| <b>Trichon B.</b> <sup>43</sup>       | Left ventriculography                      | MR present/absent                                 | Advanced CHF with EF≤40% and NYHA 3-4 |
| <b>Uddin AM.</b> <sup>44</sup>        | Echocardiography                           | Maximum regurgitant jet area                      | First STEMI                           |
| <b>Upadhyay GA.</b> <sup>45</sup>     | Echocardiography                           | Maximum regurgitant jet area ,VCW and PISA        | LV dysfunction undergoing CRT         |
| <b>Kaneko H.</b> <sup>46</sup>        | Echocardiography                           | Maximum regurgitant jet area                      | CHF                                   |
| <b>Kwon DH.</b> <sup>47</sup>         | Echocardiography                           | EROA                                              | Ischemic DCM                          |
| <b>Mallidi HR.</b> <sup>48</sup>      | Left ventriculography                      | MR present/absent                                 | Patients undergoing CABG              |
| <b>Di Mauro M.</b> <sup>49</sup>      | Echocardiography                           | Maximum regurgitant jet area                      | Ischemic DCM                          |
| <b>Okura H.</b> <sup>50</sup>         | Echocardiography                           | Maximum regurgitant jet area                      | Ischemic DCM                          |
| <b>Stolfo D.</b> <sup>51</sup>        | Echocardiography                           | EROA and VCW                                      | Idiopathic DCM                        |
| <b>Verheart D.</b> <sup>52</sup>      | Echocardiography                           | VCW                                               | DCM                                   |
| <b>Yalonetsky S.</b> <sup>53</sup>    | Echocardiography                           | Maximum regurgitant jet area , PISA and EROA      | STEMI                                 |

*Abbreviation list. EROA, effective regurgitant orifice area; MR, mitral regurgitation; VCW, Vena Contracta Width; PISA, proximal isovelocity surface area; STEMI, ST elevation myocardial infarction; CHF, chronic heart failure; EF, ejection fraction; MI, myocardial infarction; NYHA, New York Heart Association; CRT, cardiac resynchronization therapy; DCM, dilative cardiomyopathy; PCI, percutaneous coronary intervention; NSTEMI, non-ST elevation myocardial infarction; CABG, coronary artery by-pass graft.*

eTable 5. Newcastle-Ottawa Quality Assessment Scale

| Author, Ref #                   | Selection      |              | Comparability  |              | Outcome        |              |
|---------------------------------|----------------|--------------|----------------|--------------|----------------|--------------|
|                                 | Points (max 4) | Risk of bias | Points (max 2) | Risk of bias | Points (max 3) | Risk of bias |
| Abate E. <sup>1</sup>           | 3              | Medium       | 2              | Low          | 3              | Low          |
| Agricola E. <sup>2</sup>        | 3              | Medium       | 2              | Low          | 2              | Medium       |
| Agricola E. <sup>3</sup>        | 2              | Medium       | 2              | Low          | 1              | High         |
| Aronson D. <sup>4</sup>         | 4              | Low          | 2              | Low          | 2              | Medium       |
| Barra S. <sup>5</sup>           | 3              | Medium       | 2              | Low          | 2              | Medium       |
| Boriani G. <sup>6</sup>         | 4              | Low          | 1              | Medium       | 2              | Medium       |
| Bruch C. <sup>7</sup>           | 3              | Medium       | 2              | Low          | 2              | Medium       |
| Bursi F. <sup>8</sup>           | 4              | Low          | 2              | Low          | 3              | Low          |
| Bursi F. <sup>9</sup>           | 3              | Medium       | 2              | Low          | 3              | Low          |
| Calafiore AM. <sup>10</sup>     | 4              | Low          | 2              | Low          | 3              | Low          |
| Cioffi F. <sup>11</sup>         | 4              | Low          | 2              | Low          | 2              | Medium       |
| Ellis S. <sup>12</sup>          | 3              | Medium       | 2              | Low          | 1              | High         |
| Engstrom AE. <sup>13</sup>      | 4              | Low          | 2              | Low          | 1              | High         |
| Faris R. <sup>14</sup>          | 4              | Low          | 2              | Low          | 2              | Medium       |
| Fattouch K. <sup>15</sup>       | 4              | Low          | 2              | Low          | 3              | Low          |
| Feinberg MS. <sup>16</sup>      | 4              | Low          | 2              | Low          | 3              | Low          |
| Garcia-Cosio MD. <sup>17</sup>  | 4              | Low          | 2              | Low          | 1              | High         |
| Grayburn PA. <sup>18</sup>      | 4              | Low          | 2              | Low          | 3              | Low          |
| Grigioni F. <sup>19</sup>       | 4              | Low          | 2              | Low          | 3              | Low          |
| Grigioni F. <sup>20</sup>       | 4              | Low          | 2              | Low          | 2              | Medium       |
| Hickey M. <sup>21</sup>         | 4              | Low          | 2              | Low          | 3              | Low          |
| Hillis GS. <sup>22</sup>        | 4              | Low          | 2              | Low          | 1              | High         |
| Kajimoto K. (pEF) <sup>23</sup> | 4              | Low          | 2              | Low          | 3              | Low          |
| Kajimoto K. (rEF) <sup>23</sup> | 4              | Low          | 2              | Low          | 3              | Low          |
| Karatolios K. <sup>24</sup>     | 3              | Medium       | 2              | Low          | 2              | Medium       |
| Koelling T. <sup>25</sup>       | 4              | Low          | 2              | Low          | 3              | Low          |
| Lamas G. <sup>26</sup>          | 4              | Low          | 2              | Low          | 3              | Low          |
| Lancellotti P. <sup>27</sup>    | 4              | Low          | 2              | Low          | 2              | Medium       |
| Lehmann KG. <sup>28</sup>       | 4              | Low          | 2              | Low          | 3              | Low          |
| Lopez-Perez M. <sup>29</sup>    | 4              | Low          | 2              | Low          | 2              | Medium       |
| MacHaalany J. <sup>30</sup>     | 4              | Low          | 2              | Low          | 2              | Medium       |
| Mentias A. <sup>31</sup>        | 4              | Low          | 2              | Low          | 2              | Medium       |
| Naser N. <sup>32</sup>          | 2              | Medium       | 1              | Medium       | 3              | Low          |
| Neskovic AN. <sup>33</sup>      | 2              | Medium       | 2              | Low          | 3              | Low          |
| Nunez-Gil I. <sup>34</sup>      | 3              | Medium       | 2              | Low          | 3              | Low          |
| Pastorius CA. <sup>35</sup>     | 4              | Low          | 2              | Low          | 3              | Low          |
| Patel J. <sup>36</sup>          | 4              | Low          | 2              | Low          | 3              | Low          |
| Pellizzon GG. <sup>37</sup>     | 4              | Low          | 2              | Low          | 2              | Medium       |
| Perez de Isla L. <sup>38</sup>  | 4              | Low          | 2              | Low          | 2              | Medium       |
| Persson A. <sup>39</sup>        | 4              | Low          | 2              | Low          | 2              | Medium       |
| Rihal C. <sup>40</sup>          | 4              | Low          | 2              | Low          | 3              | Low          |
| Rossi A. <sup>41</sup>          | 3              | Medium       | 2              | Low          | 2              | Medium       |

|                                    |   |        |   |        |   |        |
|------------------------------------|---|--------|---|--------|---|--------|
| <b>Tcheng JE.</b> <sup>42</sup>    | 4 | Low    | 2 | Low    | 3 | Low    |
| <b>Trichon B.</b> <sup>43</sup>    | 3 | Medium | 2 | Low    | 2 | Medium |
| <b>Uddin AM.</b> <sup>44</sup>     | 4 | Low    | 2 | Low    | 2 | Medium |
| <b>Upadhyay GA.</b> <sup>45</sup>  | 3 | Medium | 1 | Medium | 2 | Medium |
| <b>Kaneko H.</b> <sup>46</sup>     | 4 | Low    | 2 | Low    | 2 | Medium |
| <b>Kwon DH.</b> <sup>47</sup>      | 4 | Low    | 2 | Low    | 2 | Medium |
| <b>Mallidi HR.</b> <sup>48</sup>   | 4 | Low    | 2 | Low    | 2 | Medium |
| <b>Di Mauro M.</b> <sup>49</sup>   | 4 | Low    | 2 | Low    | 3 | Low    |
| <b>Okura H.</b> <sup>50</sup>      | 3 | Medium | 2 | Low    | 2 | Medium |
| <b>Stolfo D.</b> <sup>51</sup>     | 4 | Low    | 2 | Low    | 1 | High   |
| <b>Verheart D.</b> <sup>52</sup>   | 4 | Low    | 2 | Low    | 2 | Medium |
| <b>Yalonetsky S.</b> <sup>53</sup> | 3 | Medium | 2 | Low    | 2 | Medium |

Two independent reviewers undertook quality assessment and allocated stars/points for adherence to following criteria:

- Selection (adequate selection and definition of groups)
- Comparability (comparability of two groups for a selected variable and comparability for other variables)
- Outcome (modality of assessment, enough length of follow-up and adequacy of follow-up)

Studies with 4 stars for selection, 2 for comparability, and 3 for outcome were defined at low risk of bias. Studies with 2 or 3 stars for selection, 1 for comparability, and 2 for outcome were defined at medium risk. Any study with a score of 1 for selection or outcome ascertainment, or 0 for any of the three domains, was deemed at high risk of bias.

**eTable 6.** Leave-One-Out Sensitivity Analysis for the Primary End Point (Results After Removing 1 Study at a Time)

| Authors, Ref <sup>#</sup>      | All-cause mortality<br>(SMR yes/no) |          | All-cause mortality<br>(Qualitative SMR<br>assessment) |          | All-cause mortality<br>(Quantitative SMR<br>assessment) |          |
|--------------------------------|-------------------------------------|----------|--------------------------------------------------------|----------|---------------------------------------------------------|----------|
|                                | RR [95% CI]                         | p value  | RR [95% CI]                                            | p value  | RR [95% CI]                                             | p value  |
| Abate E. <sup>1</sup>          | -                                   | -        | -                                                      | -        | 2.01 [1.73-<br>2.32]                                    | <0.00001 |
| Agricola E. <sup>2</sup>       | -                                   | -        | -                                                      | -        | 2.00 [1.72-<br>2.32]                                    | <0.00001 |
| Agricola E. <sup>3</sup>       | 1.76 [1.44-<br>2.16]                | <0.00001 | -                                                      | -        | 1.97 [1.70-<br>2.28]                                    | <0.00001 |
| Aronson D. <sup>4</sup>        | 1.72 [1.41-<br>2.10]                | <0.00001 | 2.00 [1.69-<br>2.37]                                   | <0.00001 | -                                                       | -        |
| Barra S. <sup>5</sup>          | 1.83 [1.48-<br>2.26]                | <0.00001 | 1.87 [1.59-<br>2.20]                                   | <0.00001 | -                                                       | -        |
| Boriani G. <sup>6</sup>        | -                                   | -        | 2.01 [1.71-<br>2.36]                                   | <0.00001 | -                                                       | -        |
| Bruch C. <sup>7</sup>          | -                                   | -        | -                                                      | -        | 1.94 [1.68-<br>2.25]                                    | <0.00001 |
| Bursi F. <sup>8</sup>          | -                                   | -        | 2.04 [1.73-<br>2.41]                                   | <0.00001 | -                                                       | -        |
| Calafiore AM. <sup>10</sup>    | 1.88 [1.52-<br>2.33]                | <0.00001 | -                                                      | -        | -                                                       | -        |
| Cioffi F. <sup>11</sup>        | -                                   | -        | 1.94 [1.65-<br>2.28]                                   | <0.00001 | -                                                       | -        |
| Di Mauro M. <sup>49</sup>      | -                                   | -        | 1.96 [1.66-<br>2.31]                                   | <0.00001 | -                                                       | -        |
| Ellis S. <sup>12</sup>         | -                                   | -        | 1.83 [1.56-<br>2.14]                                   | <0.00001 | -                                                       | -        |
| Engstrom AE. <sup>13</sup>     | 1.80 [1.46-<br>2.21]                | <0.00001 | 1.90 [1.62-<br>2.23]                                   | <0.00001 | -                                                       | -        |
| Faris R. <sup>14</sup>         | 1.79 [1.46-<br>2.20]                | <0.00001 | -                                                      | -        | -                                                       | -        |
| Fattouch K. <sup>15</sup>      | -                                   | -        | -                                                      | -        | 1.93 [1.67-<br>2.24]                                    | <0.00001 |
| Feinberg MS. <sup>16</sup>     | -                                   | -        | 1.95 [1.65-<br>2.30]                                   | <0.00001 | -                                                       | -        |
| Garcia-Cosio MD. <sup>17</sup> | -                                   | -        | 1.99 [1.68-<br>2.35]                                   | <0.00001 | -                                                       | -        |
| Grigioni F. <sup>19</sup>      | 1.78 [1.45-<br>2.20]                | <0.00001 | -                                                      | -        | 1.96 [1.66-<br>2.31]                                    | <0.00001 |
| Hickey M. <sup>21</sup>        | 1.88 [1.49-<br>2.38]                | <0.00001 | -                                                      | -        | -                                                       | -        |
| Hillis GS. <sup>22</sup>       | -                                   | -        | 2.07 [1.75-<br>2.45]                                   | <0.00001 | -                                                       | -        |
| Kaneko H. <sup>46</sup>        | -                                   | -        | 1.96 [1.66-<br>2.31]                                   | <0.00001 | -                                                       | -        |
| Koelling T. <sup>25</sup>      | -                                   | -        | 1.98 [1.67-<br>2.35]                                   | <0.00001 | -                                                       | -        |
| Lehmann KG. <sup>28</sup>      | 1.76 [1.44-<br>2.15]                | <0.00001 | -                                                      | -        | -                                                       | -        |

|                                     |                  |          |                  |          |                  |          |
|-------------------------------------|------------------|----------|------------------|----------|------------------|----------|
| <b>Lopez-Perez M.</b> <sup>29</sup> | -                | -        | 1.94 [1.65-2.29] | <0.00001 | -                | -        |
| <b>MacHaalany J.</b> <sup>55</sup>  | 1.78 [1.46-2.17] | <0.00001 | 1.95 [1.66-2.29] | <0.00001 | -                | -        |
| <b>Mallidi HR.</b> <sup>48</sup>    | 1.89 [1.53-2.32] | <0.00001 | -                | -        | -                | -        |
| <b>Mentias A.</b> <sup>31</sup>     | -                | -        | 1.98 [1.66-2.37] | <0.00001 | -                | -        |
| <b>Naser N.</b> <sup>32</sup>       | -                | -        | -                | -        | 1.90 [1.64-2.20] | <0.00001 |
| <b>Neskovic AN.</b> <sup>33</sup>   | 1.78 [1.45-2.17] | <0.00001 | -                | -        | -                | -        |
| <b>Okura H.</b> <sup>50</sup>       | -                | -        | 1.93 [1.64-2.27] | <0.00001 | -                | -        |
| <b>Pastorius CA.</b> <sup>35</sup>  | 1.82 [1.47-2.25] | <0.00001 | -                | -        | -                | -        |
| <b>Patel J.</b> <sup>36</sup>       | -                | -        | -                | -        | 2.06 [1.78-2.38] | <0.00001 |
| <b>Pellizzon GG.</b> <sup>37</sup>  | 1.61 [1.36-1.91] | <0.00001 | -                | -        | -                | -        |
| <b>Persson A.</b> <sup>39</sup>     | -                | -        | 1.99 [1.68-2.35] | <0.00001 | -                | -        |
| <b>Rihal C.</b> <sup>40</sup>       | -                | -        | 1.99 [1.69-2.34] | <0.00001 | -                | -        |
| <b>Rossi A.</b> <sup>41</sup>       | -]               | -        | -                | -        | 2.03 [1.70-2.42] | <0.00001 |
| <b>Tcheng JE.</b> <sup>42</sup>     | 1.65 [1.37-1.97] | <0.00001 | -                | -        | -                | -        |
| <b>Trichon B.</b> <sup>43</sup>     | 1.90 [1.49-2.43] | <0.00001 | -                | -        | -                | -        |
| <b>Uddin AM.</b> <sup>44</sup>      | -                | -        | 2.03 [1.72-2.40] | <0.00001 | -                | -        |
| <b>Upadhyay GA.</b> <sup>45</sup>   | 1.84 [1.49-2.29] | <0.00001 | -                | -        | -                | -        |
| <b>Yalonetsky S.</b> <sup>53</sup>  | -                | -        | 1.94 [1.65-2.28] | <0.00001 | -                | -        |

Abbreviation list. SMR, functional mitral regurgitation; RR, risk ratio.



**eTable 7.** Additional Sensitivity Analysis for the Primary Outcome

|                                                    | All-cause mortality                                                           |       |                  |         |                                                            |       |                  |         |                                                            |      |                  |         |
|----------------------------------------------------|-------------------------------------------------------------------------------|-------|------------------|---------|------------------------------------------------------------|-------|------------------|---------|------------------------------------------------------------|------|------------------|---------|
|                                                    | SMR present vs absent detected either at echocardiography or ventriculography |       |                  |         | SMR detected at echocardiography and qualitatively graded. |       |                  |         | SMR detected at echocardiography and quantitatively graded |      |                  |         |
|                                                    | Studies                                                                       | n     | RR [95% CI]      | P       | Studies                                                    | n     | RR [95% CI]      | P       | Studies                                                    | n    | RR [95% CI]      | P       |
| Removal of studies at low risk of bias             | 5                                                                             | 3637  | 1.6 [1.1-1.59]   | <0.001  | 8                                                          | 8789  | 2.61 [1.89-3.60] | <0.0001 | 5                                                          | 2366 | 2.17 [1.76-2.68] | <0.0001 |
| Removal of studies with moderate-high risk of bias | 12                                                                            | 23071 | 2.12 [1.52-2.96] | <0.001  | 15                                                         | 13583 | 1.65 [1.41-1.93] | <0.0001 | 4                                                          | 2990 | 1.86 [1.43-2.42] | <0.0001 |
| Removal of studies with PISA assessment of SMR     | -                                                                             | -     | -                | -       | -                                                          | -     | -                | -       | 3                                                          | 358  | 2.17 [1.62-2.89] | <0.0001 |
| Removal of studies reporting unadjusted estimates  | 12                                                                            | 22999 | 1.47 [1.24-1.73] | <0.0001 | 16                                                         | 13693 | 1.62 [1.40-1.88] | <0.0001 | 6                                                          | 4256 | 2.02 [1.72-2.38] | <0.0001 |

Abbreviation list. SMR, functional mitral regurgitation; RR, risk ratio.

eTable 8. Meta-regression Analysis for All-Cause Mortality

| Variable                        | All-cause mortality (SMR yes/no) |              |           | All-cause mortality (Qualitative SMR assessment) |              |           | All-cause mortality (Quantitative SMR assessment) |       |   |
|---------------------------------|----------------------------------|--------------|-----------|--------------------------------------------------|--------------|-----------|---------------------------------------------------|-------|---|
|                                 | Slope                            | p            | n         | Slope                                            | p            | n         | Slope                                             | p     | n |
| Age                             | -0.03                            | 0.250        | 14        | -0.01                                            | 0.732        | 21        | -0.03                                             | 0.129 | 9 |
| Atrial Fibrillation             | 0.00                             | 0.705        | 4         | 0.01                                             | 0.287        | 12        | 0.00                                              | 0.990 | 6 |
| EDV (ml)                        | 0.03                             | 0.603        | 3         | -0.01                                            | 0.227        | 9         | -                                                 | -     | - |
| ESV (ml)                        | 0.03                             | 0.790        | 3         | -0.01                                            | 0.221        | 8         | -                                                 | -     | - |
| Ischemic etiology               | -0.00                            | 0.623        | 15        | 0.00                                             | 0.244        | 21        | -0.00                                             | 0.743 | 7 |
| Left Atrium dimension (mm)      | -0.02                            | 0.106        | 4         | -0.03                                            | 0.178        | 13        | -0.00                                             | 0.865 | 4 |
| LVEDD (mm)                      | -0.00                            | 0.777        | 7         | -0.03                                            | 0.139        | 20        | -0.01                                             | 0.366 | 4 |
| LVESD (mm)                      | 0.00                             | 0.915        | 7         | -0.02                                            | 0.277        | 19        | -0.01                                             | 0.128 | 4 |
| LVEF (%)                        | 0.00                             | 0.904        | 7         | 0.01                                             | 0.170        | 21        | 0.05                                              | 0.028 | 7 |
| Male gender (%)                 | 0.01                             | 0.440        | 13        | 0.00                                             | 0.522        | 21        | -0.03                                             | 0.057 | 7 |
| Mitral Deceleration Time (msec) | -                                | -            | -         | -0.00                                            | 0.994        | 10        | 0.01                                              | 0.267 | 4 |
| NYHA I/II                       | 0.01                             | 0.667        | 4         | -0.01                                            | 0.424        | 9         | -0.02                                             | 0.231 | 2 |
| NYHA III/IV                     | -0.01                            | 0.667        | 4         | <b>-0.01</b>                                     | <b>0.036</b> | <b>10</b> | 0.03                                              | 0.005 | 4 |
| Number of patients              | -0.00                            | 0.084        | 15        | -0.00                                            | 0.786        | 21        | -0.00                                             | 0.174 | 6 |
| Previous MI                     | -0.02                            | 0.046        | 7         | -0.00                                            | 0.925        | 21        | -                                                 | -     | - |
| Length of Follow-up             | <b>-0.01</b>                     | <b>0.047</b> | <b>15</b> | <b>-0.01</b>                                     | <b>0.030</b> | <b>26</b> | -0.00                                             | 0.607 | 7 |

Abbreviation list. EDV, end-diastolic volume; ESV, end-systolic volume; LVEDD, left ventricle end-diastolic diameter; LVESD, left ventricle end-systolic diameter; NYHA, New York Class Association; MI, myocardial infarction.

Supplementary Figure 1.

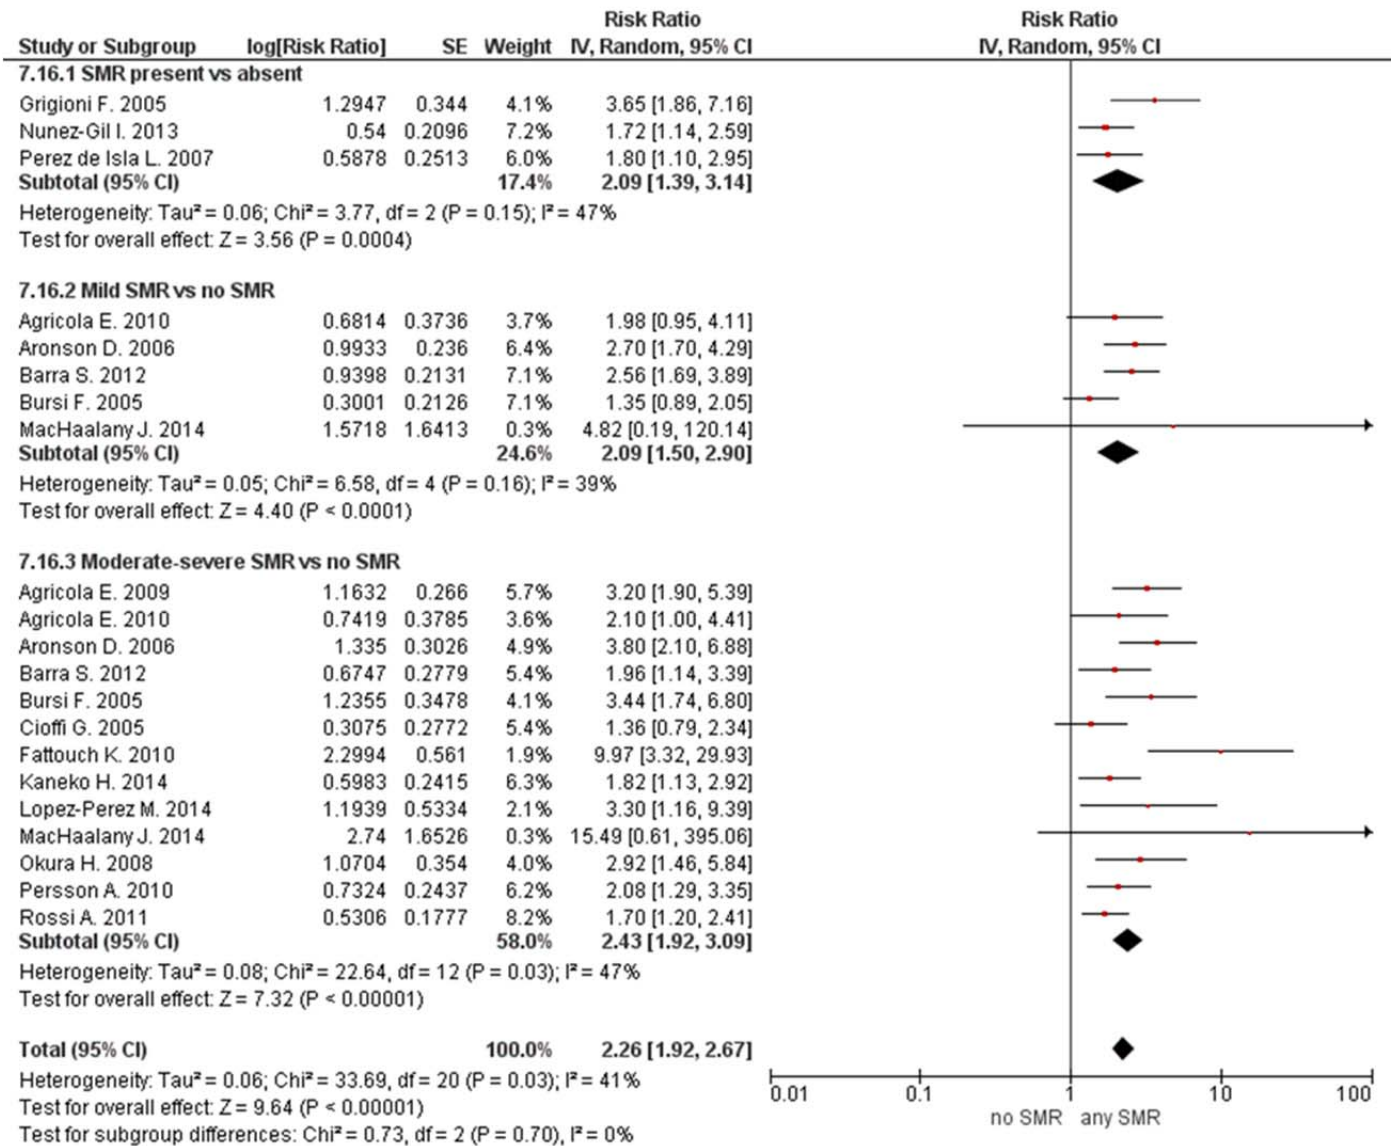

Supplementary Figure 2.

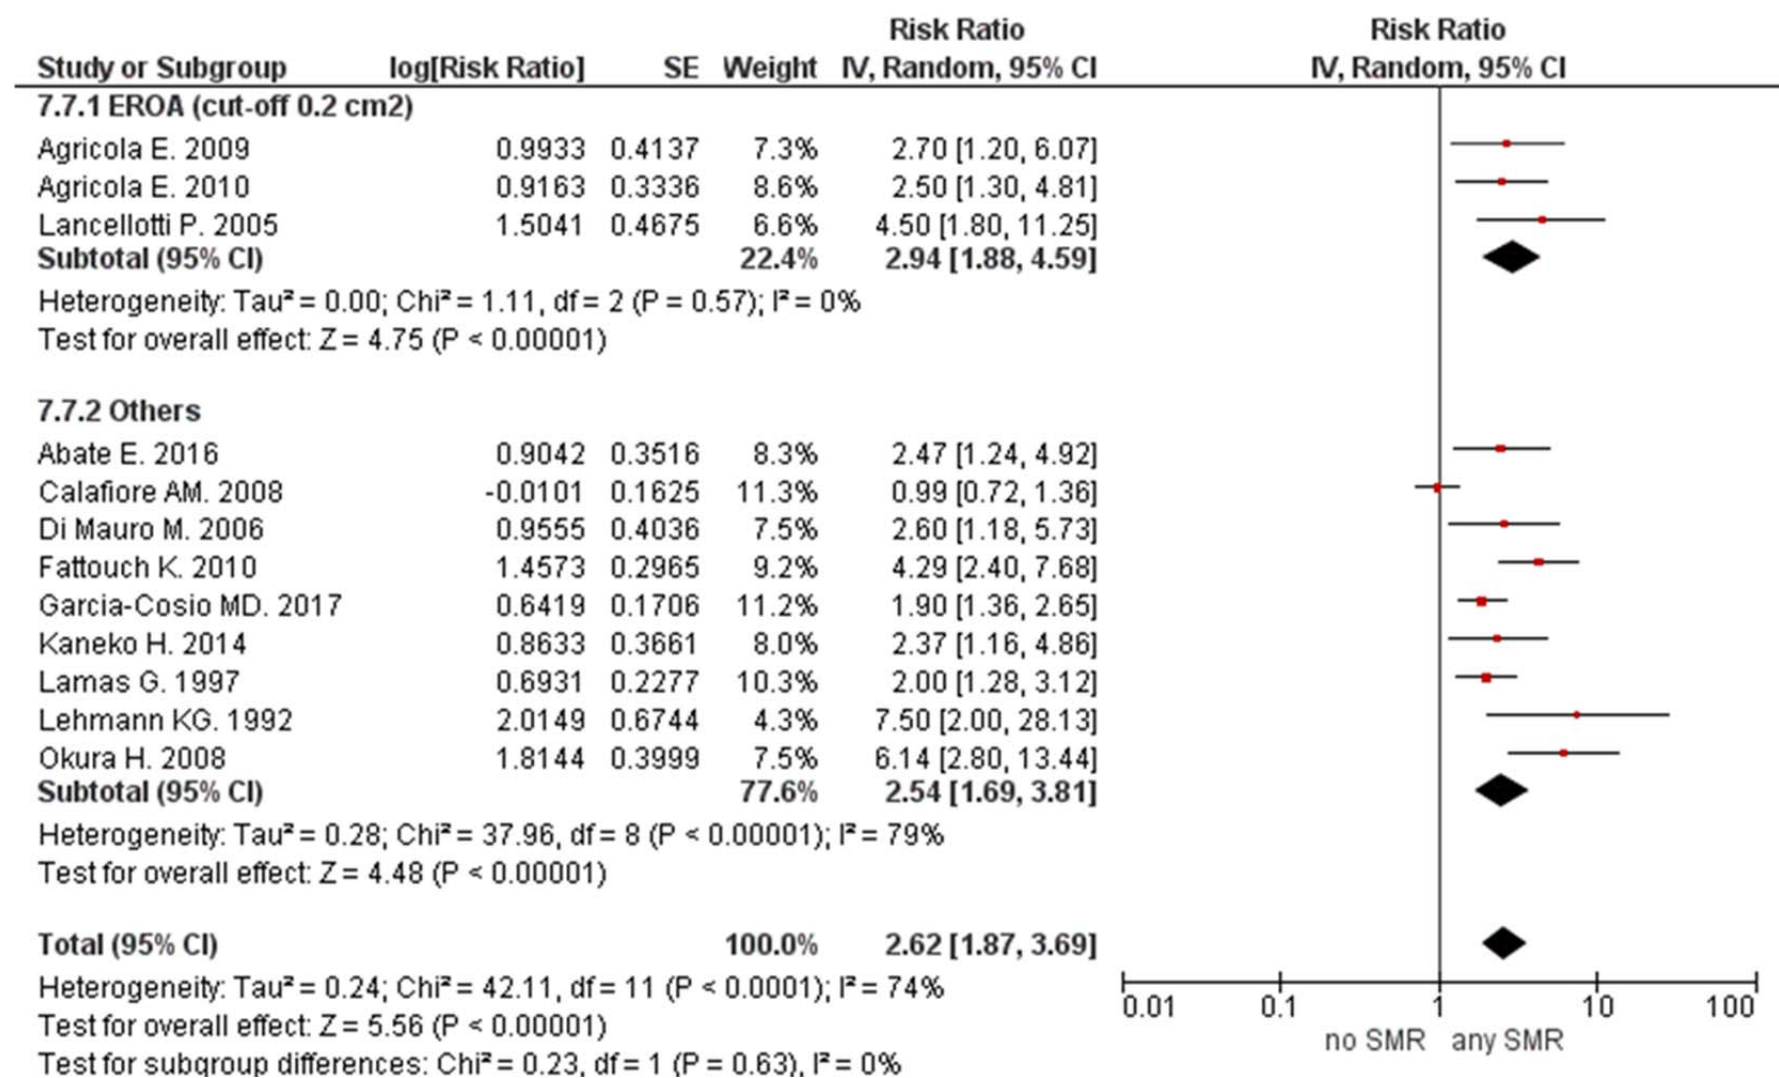

Supplementary Figure 3.

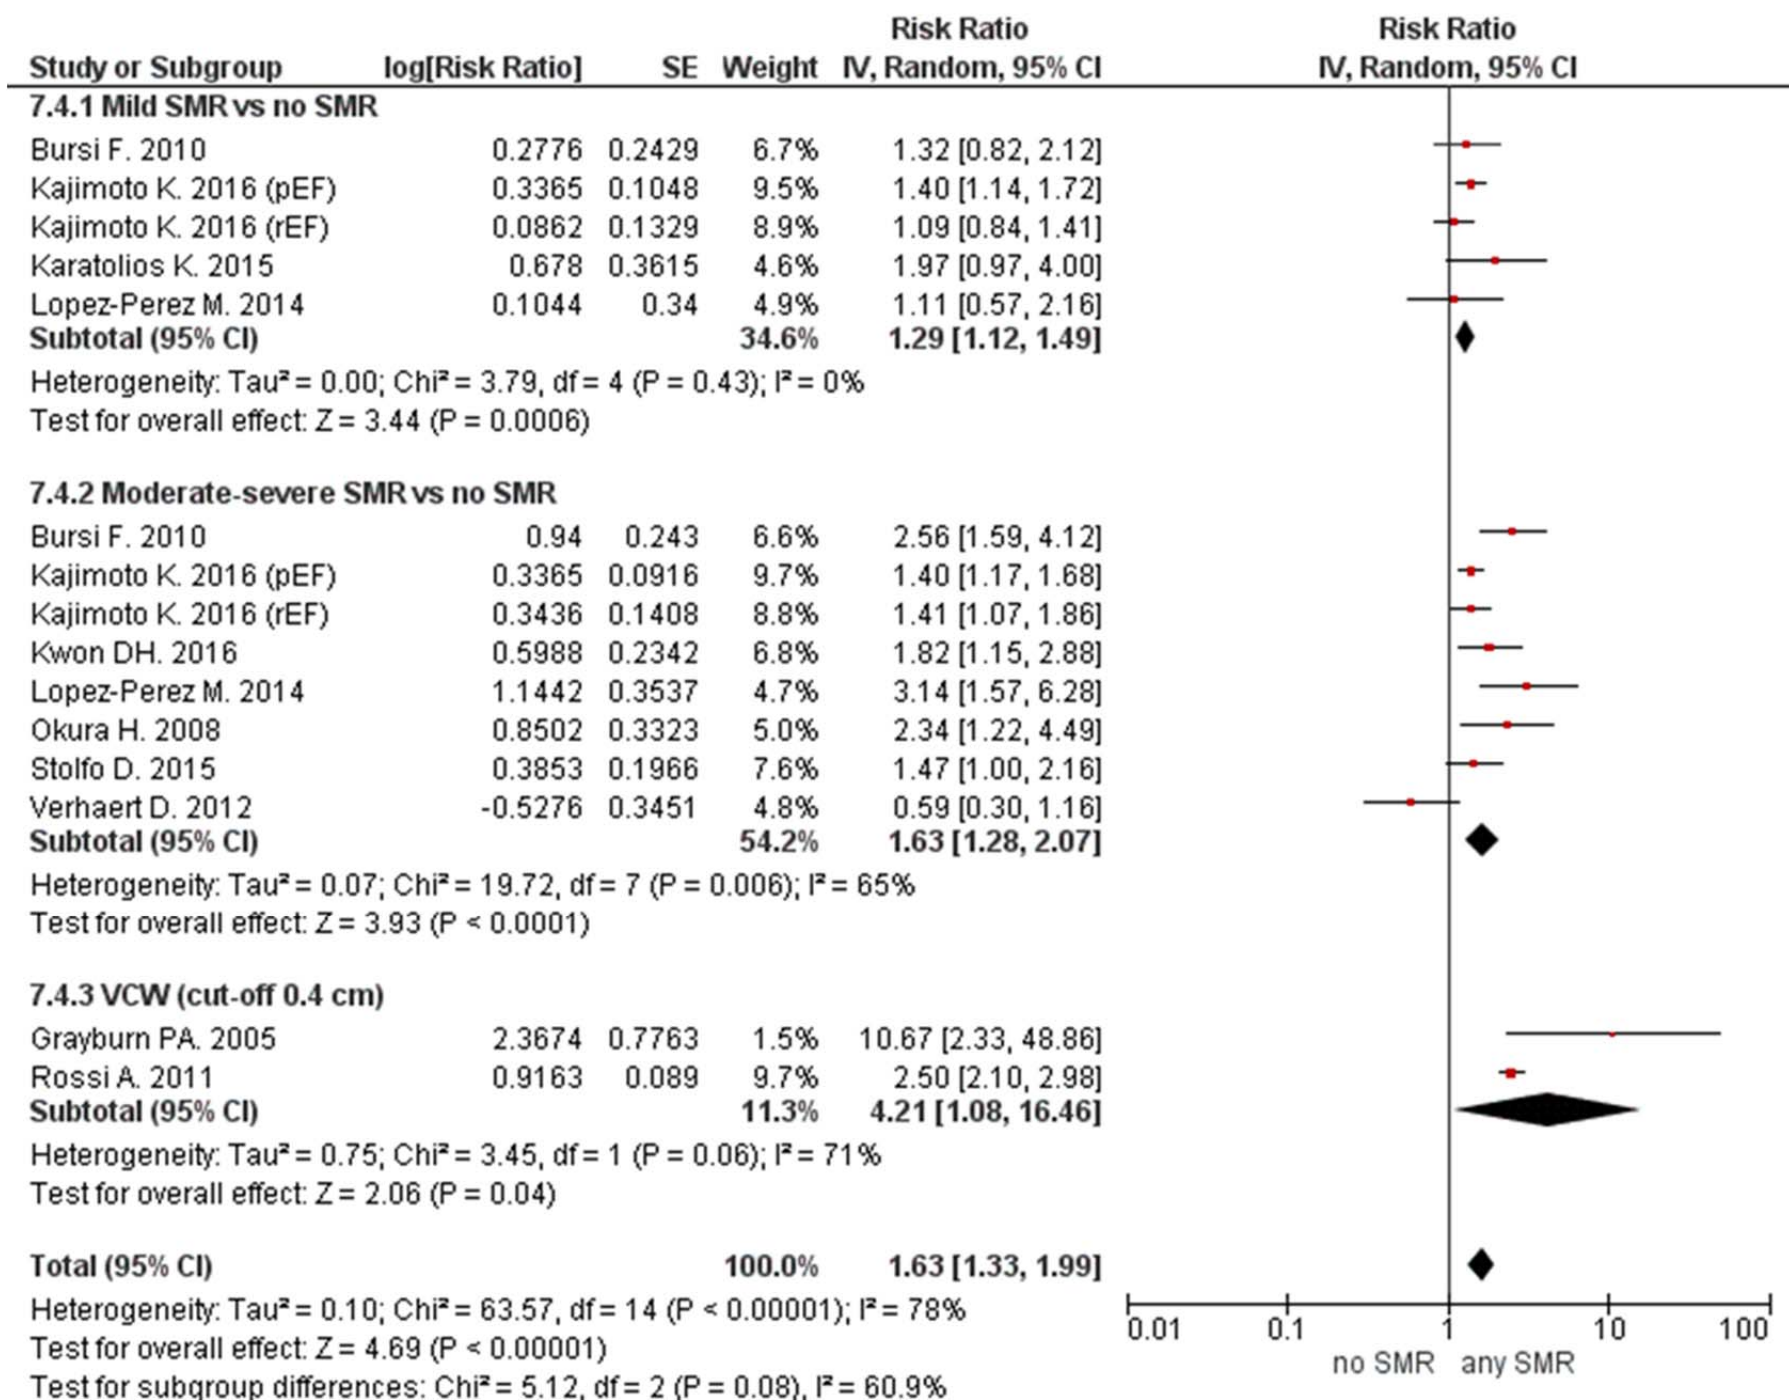

Supplementary Figure 4.

A.

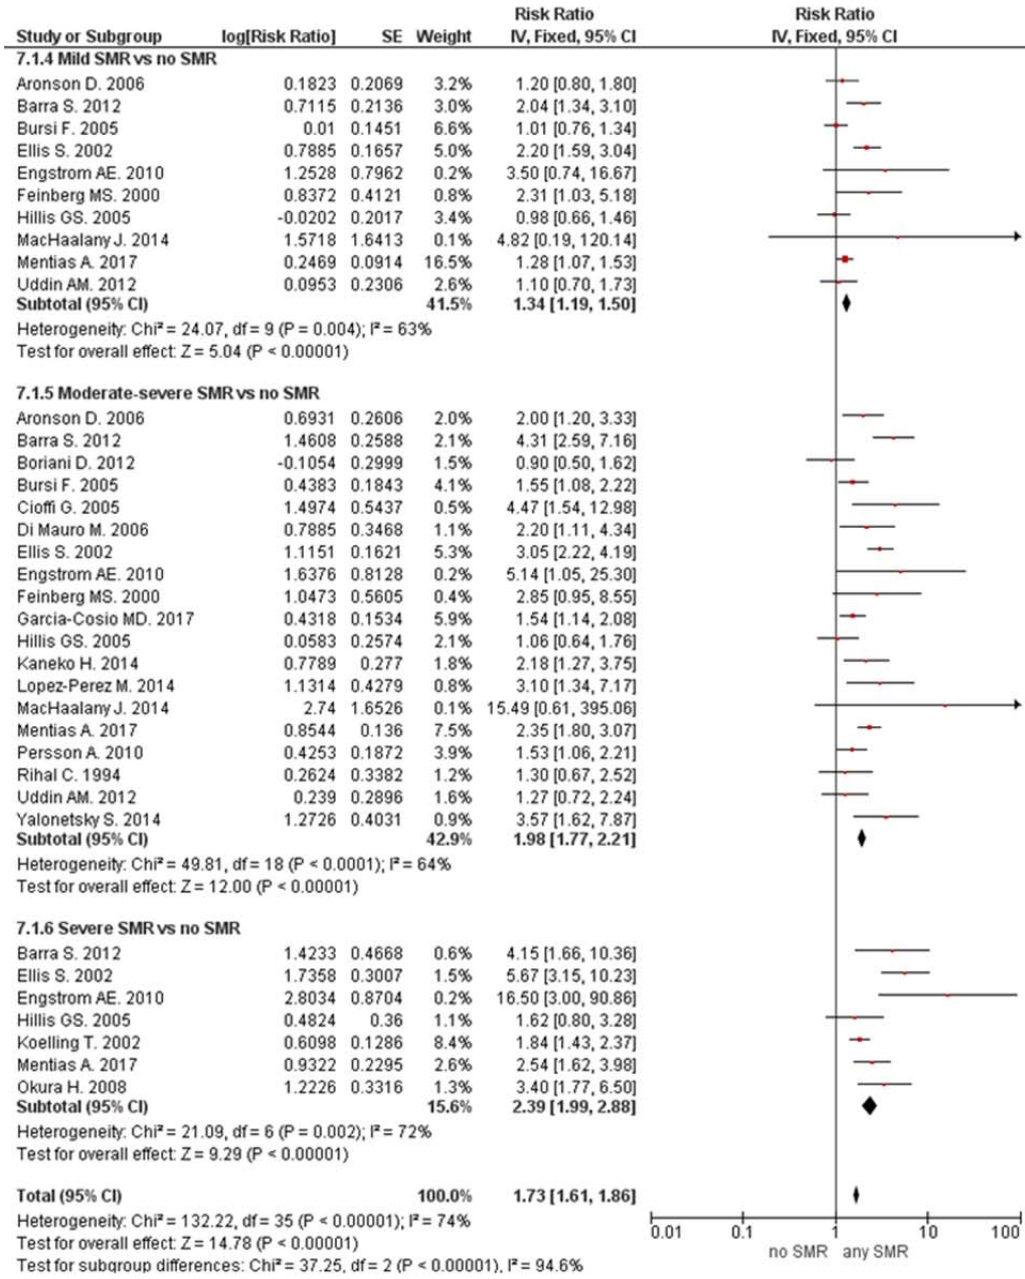

B.

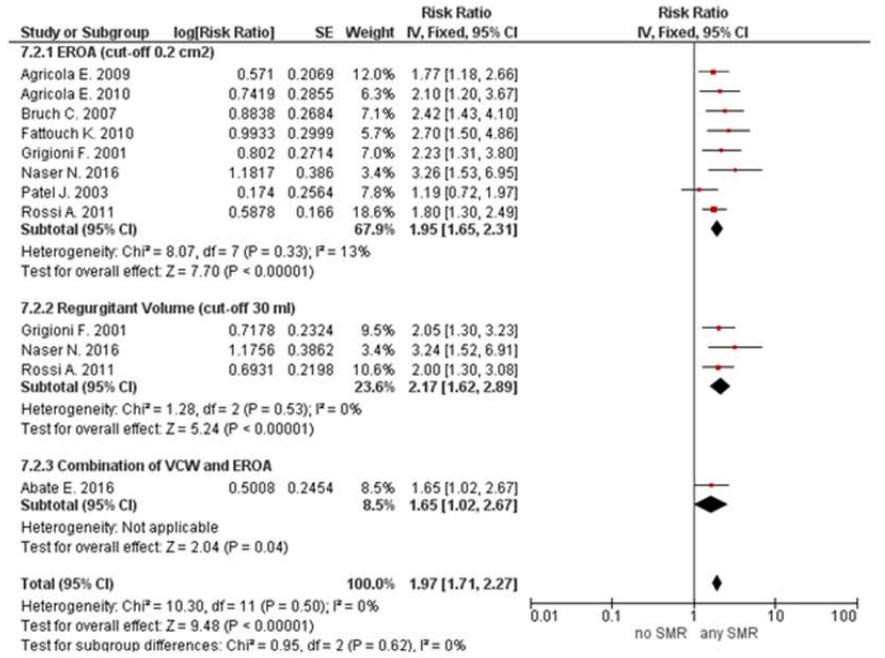

C.

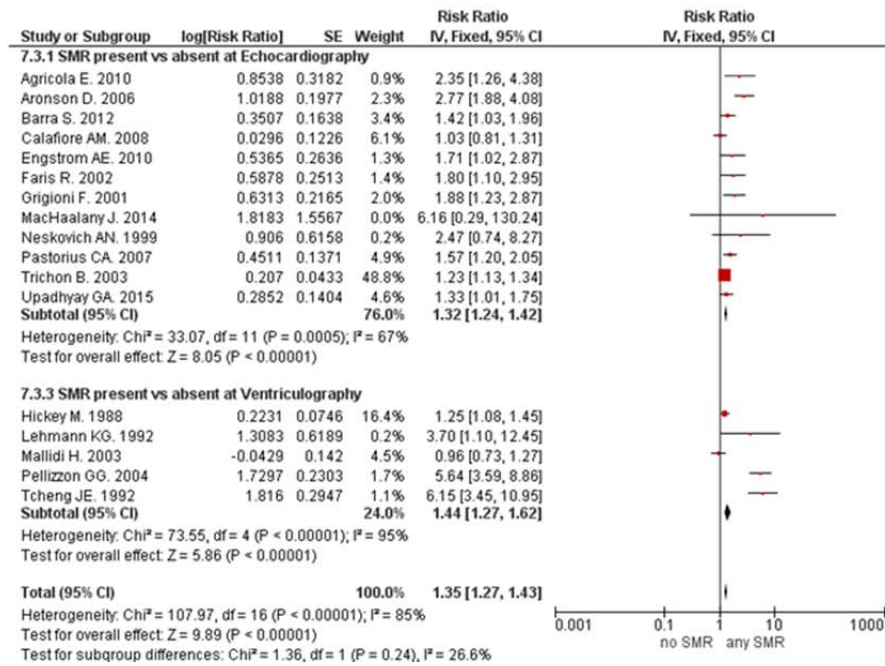

Supplementary Figure 5.

A.

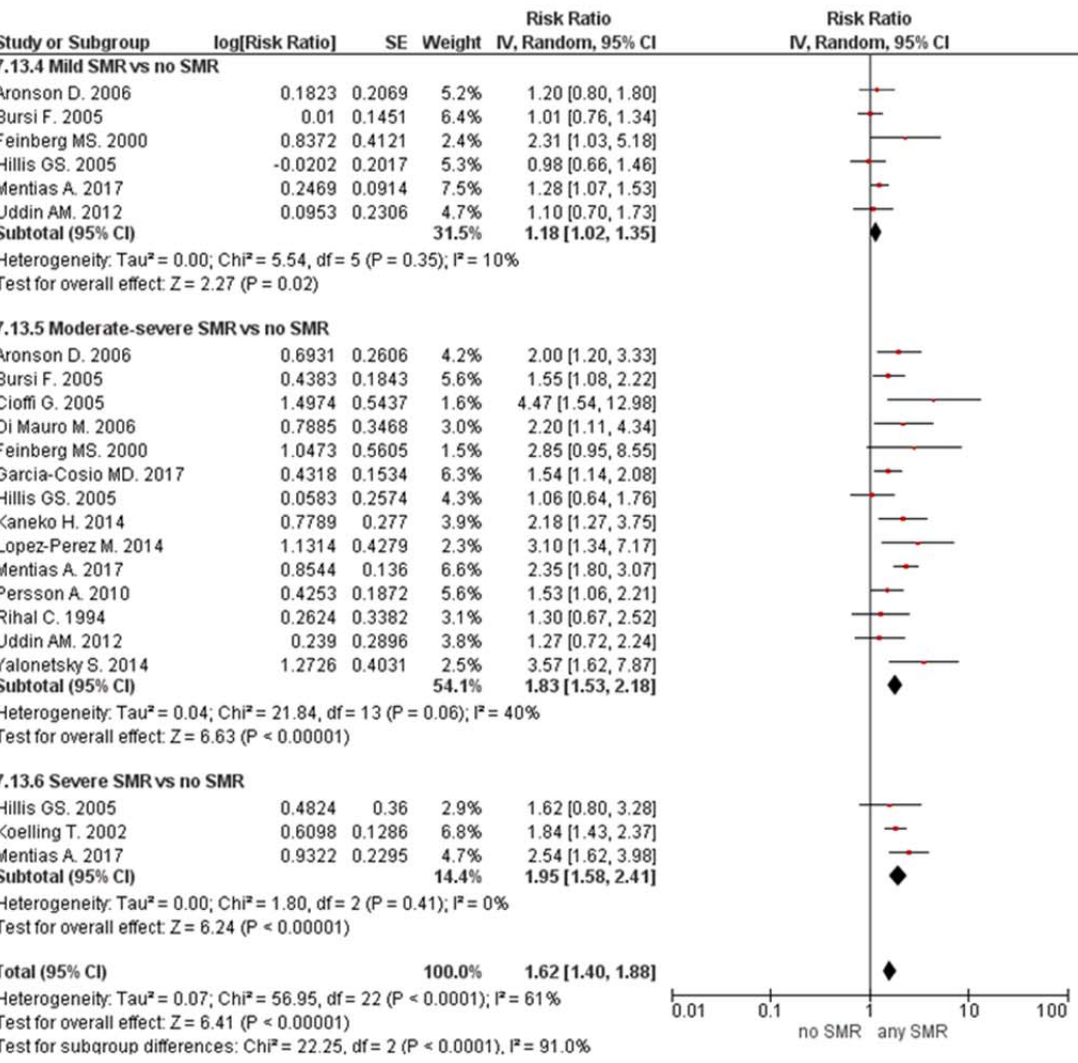

B.

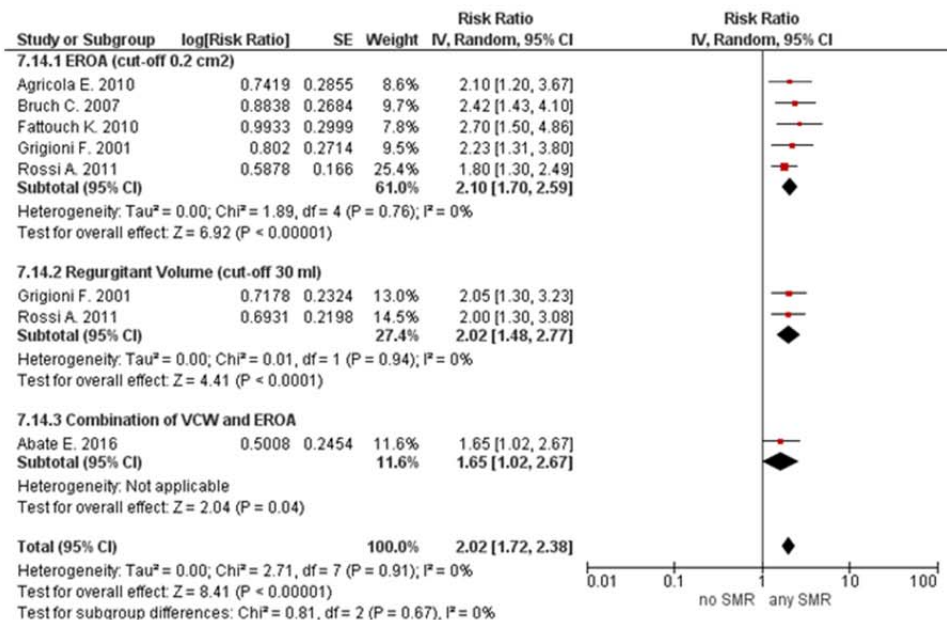

C.

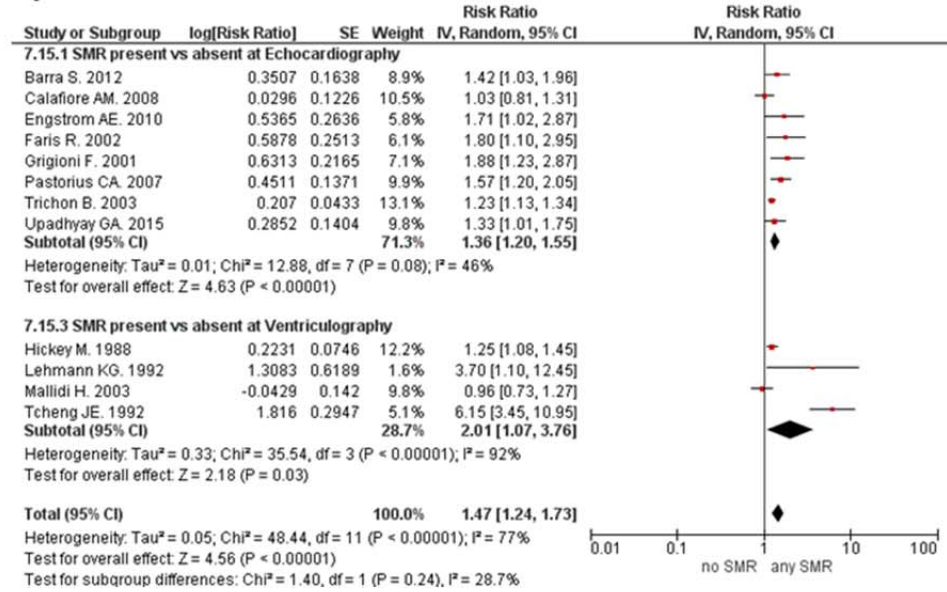

Supplementary Figure 6.

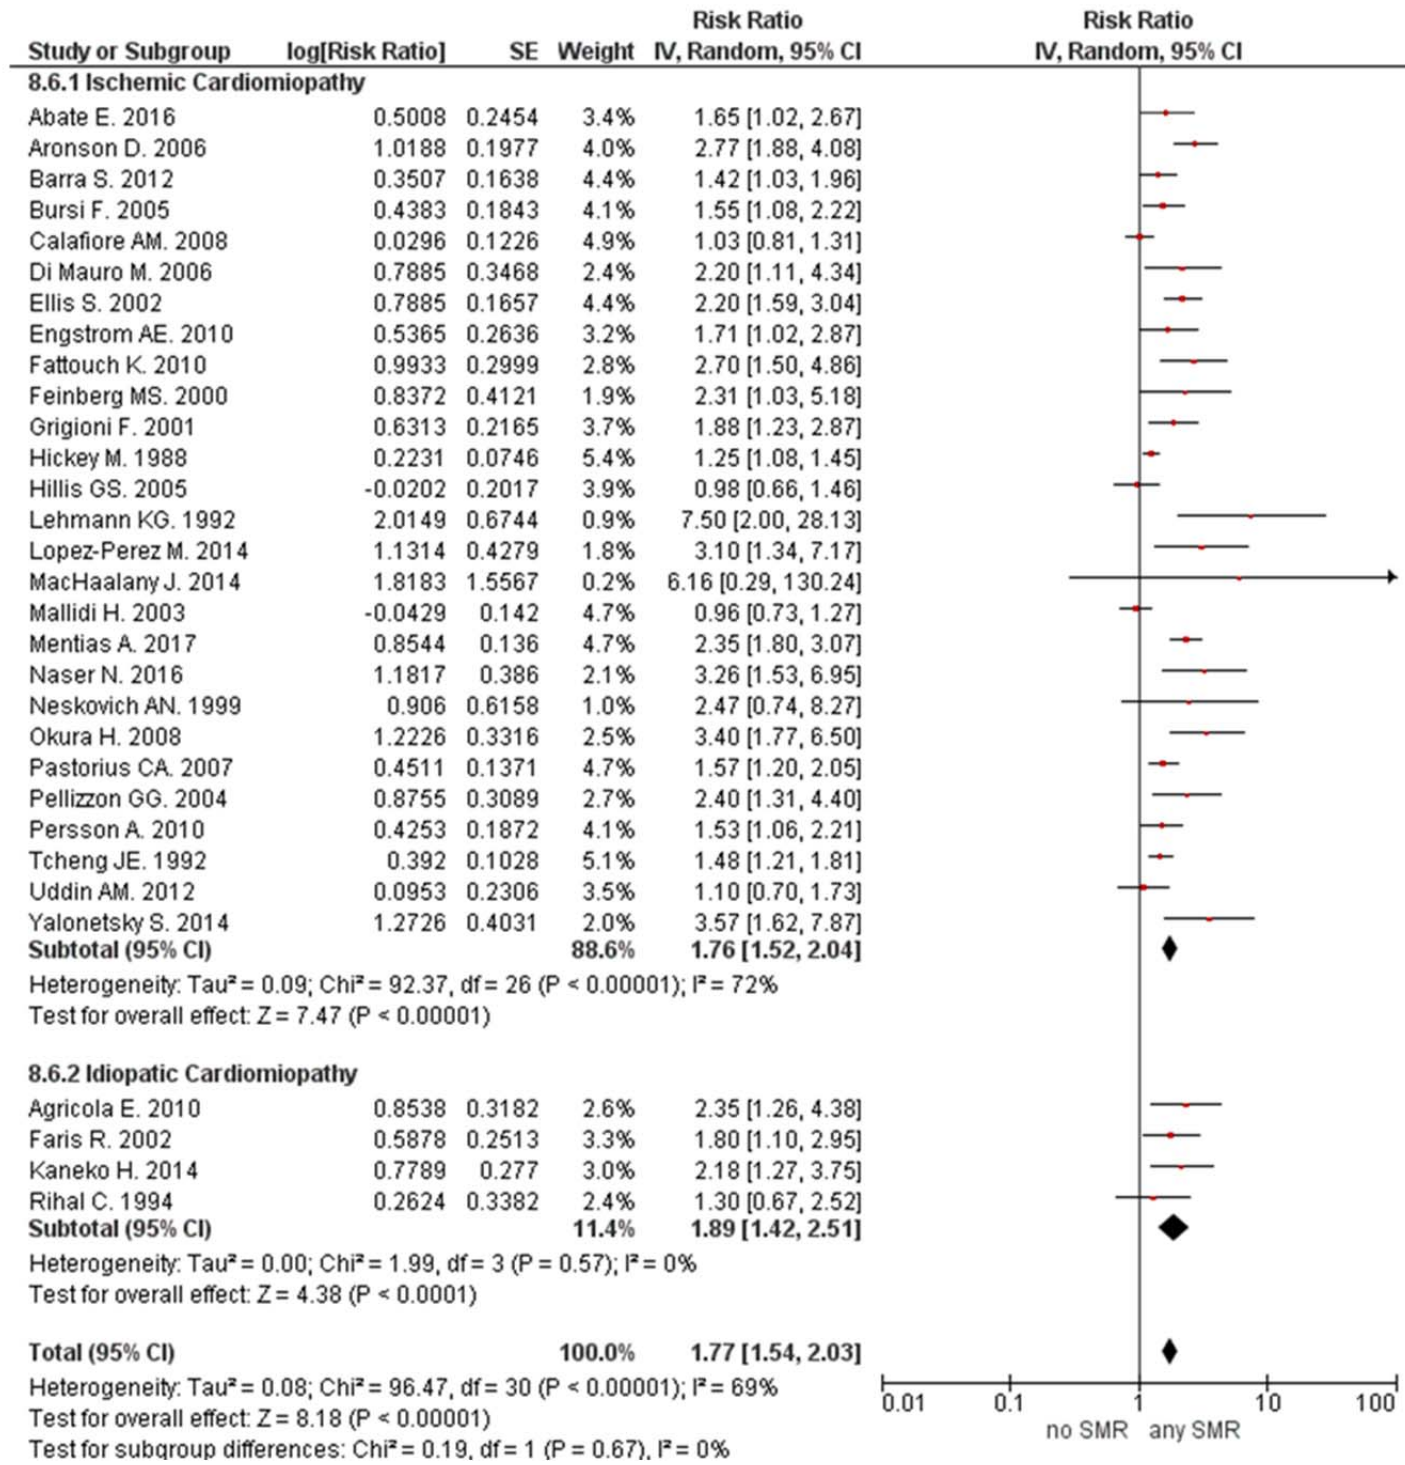



Supplementary Figure 7.

A.

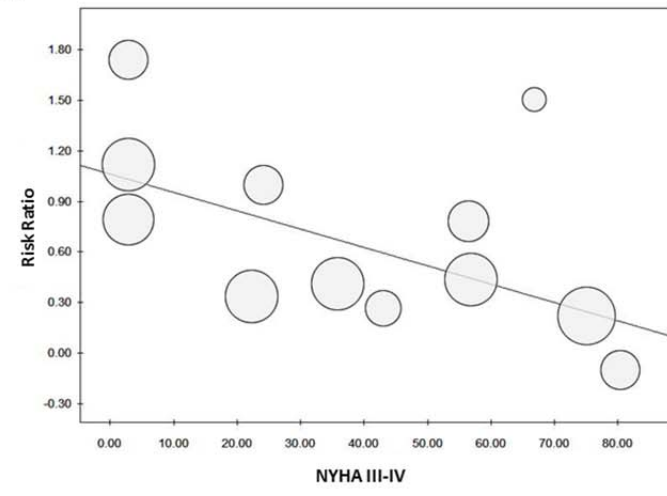

B.

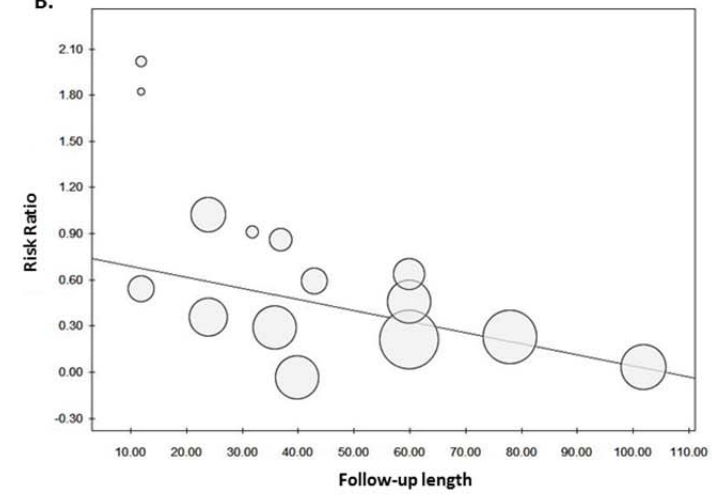

C.

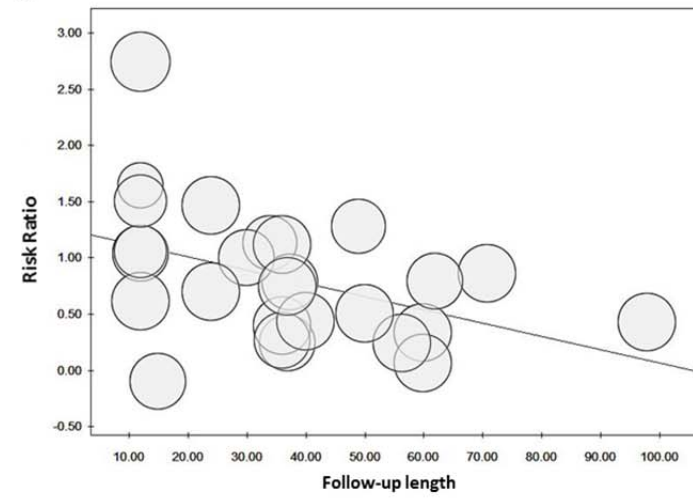

Supplementary Figure 8.

A. SMR present/absent.

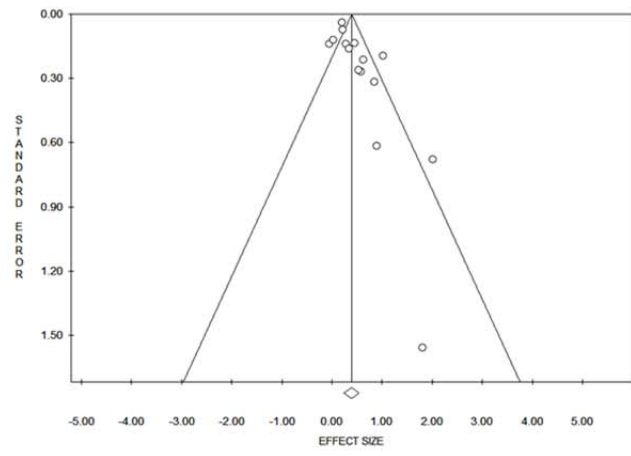

B. Qualitative SMR assessment.

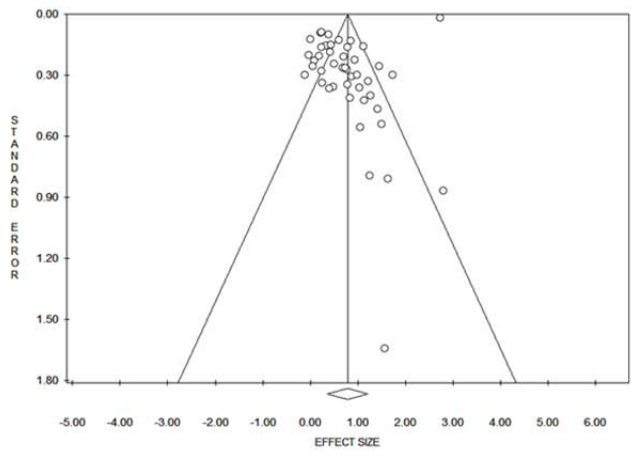

C. Quantitative SMR assessment.

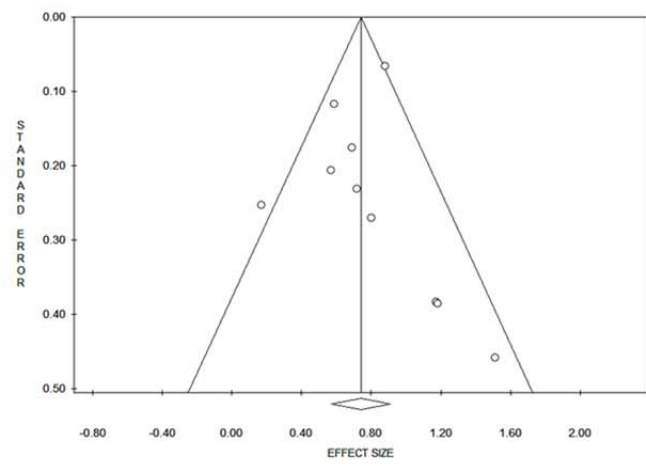

Supplementary Figure 9.

A. Hospitalization for Heart Failure.

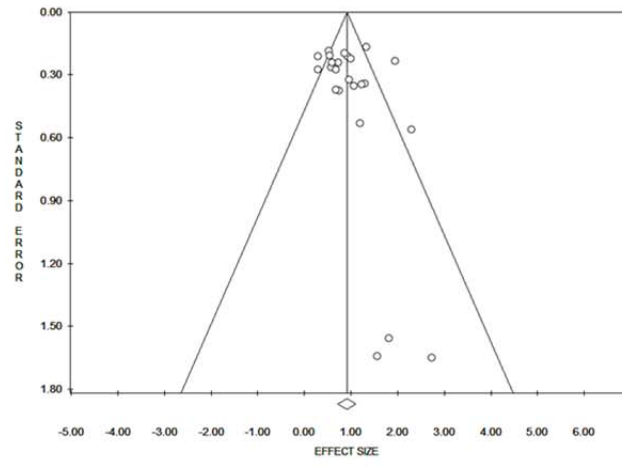

B. Cardiac Mortality.

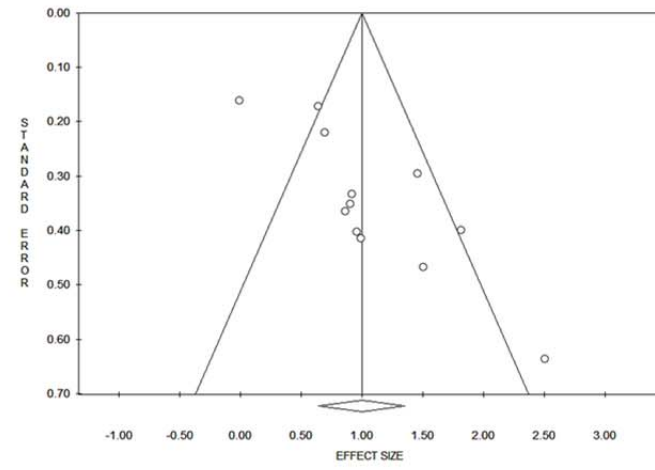

C. Death, Heart Failure and transplant.

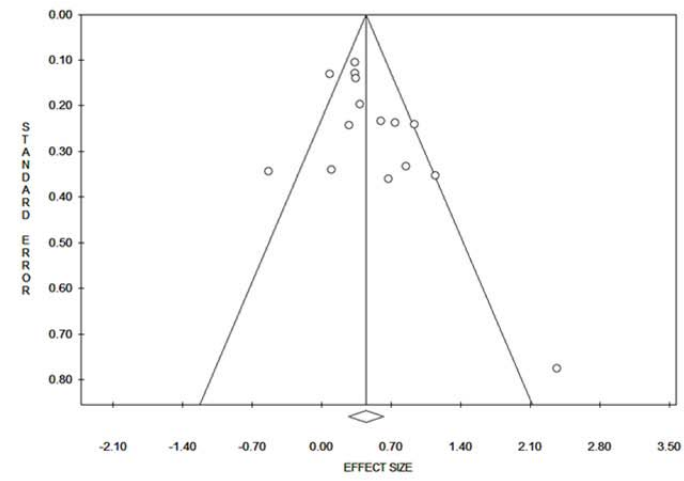

## References.

1. Abate E, Hoogslag GE, Al Amri I, et al. Time course, predictors, and prognostic implications of significant mitral regurgitation after ST-segment elevation myocardial infarction. *Am Heart J.* 2016;178:115-125.
2. Agricola E, Ielasi A, Oppizzi M, et al. Long-term prognosis of medically treated patients with functional mitral regurgitation and left ventricular dysfunction. *Eur J Heart Fail.* 2009;11(6):581-587.
3. Agricola E, Stella S, Figini F, et al. Non-ischemic dilated cardiomyopathy: prognostic value of functional mitral regurgitation. *Int J Cardiol.* 2011;146(3):426-428.
4. Aronson D, Goldsher N, Zukermann R, et al. Ischemic mitral regurgitation and risk of heart failure after myocardial infarction. *Arch Intern Med.* 2006;166(21):2362-2368.
5. Barra S, Providencia R, Paiva L, et al. Mitral regurgitation during a myocardial infarction--new predictors and prognostic significance at two years of follow-up. *Acute Card Care.* 2012;14(1):27-33.
6. Boriani G, Gasparini M, Landolina M, et al. Impact of mitral regurgitation on the outcome of patients treated with CRT-D: data from the InSync ICD Italian Registry. *Pacing Clin Electrophysiol.* 2012;35(2):146-154.
7. Bruch C, Klem I, Breithardt G, Wichter T, Gradaus R. Diagnostic usefulness and prognostic implications of the mitral E/E' ratio in patients with heart failure and severe secondary mitral regurgitation. *Am J Cardiol.* 2007;100(5):860-865.
8. Bursi F, Enriquez-Sarano M, Nkomo VT, et al. Heart failure and death after myocardial infarction in the community: the emerging role of mitral regurgitation. *Circulation.* 2005;111(3):295-301.
9. Bursi F, Barbieri A, Grigioni F, et al. Prognostic implications of functional mitral regurgitation according to the severity of the underlying chronic heart failure: a long-term outcome study. *Eur J Heart Fail.* 2010;12(4):382-388.
10. Calafiore AM, Mazzei V, Iaco AL, et al. Impact of ischemic mitral regurgitation on long-term outcome of patients with ejection fraction above 0.30 undergoing first isolated myocardial revascularization. *Ann Thorac Surg.* 2008;86(2):458-464.
11. Cioffi G, Tarantini L, De Feo S, et al. Functional mitral regurgitation predicts 1-year mortality in elderly patients with systolic chronic heart failure. *Eur J Heart Fail.* 2005;7(7):1112-1117.
12. Ellis SG, Whitlow PL, Raymond RE, Schneider JP. Impact of mitral regurgitation on long-term survival after percutaneous coronary intervention. *Am J Cardio.* 2002;89(3):315-318.
13. Engstrom AE, Vis MM, Bouma BJ, et al. Mitral regurgitation is an independent predictor of 1-year mortality in ST-elevation myocardial infarction patients presenting in cardiogenic shock on admission. *Acute Card Care.* 2010;12(2):51-57.
14. Faris R, Coats AJ, Henein MY. Echocardiography-derived variables predict outcome in patients with nonischemic dilated cardiomyopathy with or without a restrictive filling pattern. *Am Heart J.* 2002;144(2):343-350.
15. Fattouch K, Sampognaro R, Speziale G, et al. Impact of moderate ischemic mitral regurgitation after isolated coronary artery bypass grafting. *Ann Thorac Surg.* 2010;90(4):1187-1194.
16. Feinberg MS, Schwammenthal E, Shlizerman L, et al. Prognostic significance of mild mitral regurgitation by color Doppler echocardiography in acute myocardial infarction. *Am J Cardiol.* 2000;86(9):903-907.
17. Garcia-Cosio Carmena MD, Roig Minguell E, Ferrero-Gregori A, et al. Prognostic Implications of Functional Mitral Regurgitation in Patients With Heart Failure and Reduced Ejection Fraction. *Rev Esp Cardiol.* 2017. pii: S1885-5857(16)30456-X.
18. Grayburn PA, Appleton CP, DeMaria AN, et al. Echocardiographic predictors of morbidity and mortality in patients with advanced heart failure: the Beta-blocker Evaluation of Survival Trial (BEST). *J Am Coll Cardiol.* 2005;45(7):1064-1071.
19. Grigioni F, Enriquez-Sarano M, Zehr KJ, Bailey KR, Tajik AJ. Ischemic mitral regurgitation: long-term outcome and prognostic implications with quantitative Doppler assessment. *Circulation.* 2001;103(13):1759-1764.
20. Grigioni F, Detaint D, Avierinos JF, Scott C, Tajik J, Enriquez-Sarano M. Contribution of ischemic mitral regurgitation to congestive heart failure after myocardial infarction. *J Am Coll Cardiol.* 2005;45(2):260-267.
21. Hickey MS, Smith LR, Muhlbaier LH, et al. Current prognosis of ischemic mitral regurgitation. Implications for future management. *Circulation.* 1988;78(3 Pt 2):I51-59.
22. Hillis GS, Moller JE, Pellikka PA, Bell MR, Casaclang-Verzosa GC, Oh JK. Prognostic significance of echocardiographically defined mitral regurgitation early after acute myocardial infarction. *Am Heart J.* 2005;150(6):1268-1275.
23. Kajimoto K, Sato N, Takano T et al. Functional mitral regurgitation at discharge and outcomes in patients hospitalized for acute decompensated heart failure with a preserved or reduced ejection fraction. *Eur J Heart Fail.* 2016;18(8):1051-1059.
24. Karatolios K, Holzendorf V, Richter A, Schieffer B, Pankuweit S, Competence Network Heart Failure G. Long-term outcome and predictors of outcome in patients with non-ischemic dilated cardiomyopathy. *Int J Cardiol.* 2016;220:608-612.
25. Koelling TM, Aaronson KD, Cody RJ, Bach DS, Armstrong WF. Prognostic significance of mitral regurgitation and tricuspid regurgitation in patients with left ventricular systolic dysfunction. *Am Heart J.* 2002;144(3):524-529.
26. Lamas GA, Mitchell GF, Flaker GC, et al. Clinical significance of mitral regurgitation after acute myocardial infarction. Survival and Ventricular Enlargement Investigators. *Circulation.* 1997;96(3):827-833.

27. Lancellotti P, Gerard PL, Pierard LA. Long-term outcome of patients with heart failure and dynamic functional mitral regurgitation. *Eur Heart J*. 2005;26(15):1528-1532.
28. Lehmann KG, Francis CK, Dodge HT. Mitral regurgitation in early myocardial infarction. Incidence, clinical detection, and prognostic implications. TIMI Study Group. *Ann Intern Med*. 1992;117(1):10-17.
29. Lopez-Perez M, Estevez-Loureiro R, Lopez-Sainz A, et al. Long-term prognostic value of mitral regurgitation in patients with ST-segment elevation myocardial infarction treated by primary percutaneous coronary intervention. *Am J Cardiol*. Mar 15 2014;113(6):907-912.
30. MacHaalany J, Bertrand OF, O'Connor K, et al. Predictors and prognosis of early ischemic mitral regurgitation in the era of primary percutaneous coronary revascularisation. *Cardiovasc Ultrasound*. 2014;12:14.
31. Mentias A, Raza MQ, Barakat AF, et al. Prognostic Significance of Ischemic Mitral Regurgitation on Outcomes in Acute ST-Elevation Myocardial Infarction Managed by Primary Percutaneous Coronary Intervention. *Am J Cardiol*. 2017;119(1):20-26.
32. Naser N, Dzibur A, Kusljagic Z, et al. Echocardiographic Assessment of Ischaemic Mitral Regurgitation, Mechanism, Severity, Impact on Treatment Strategy and Long Term Outcome. *Acta Inform Med*. 2016;24(3):172-177.
33. Neskovic AN, Marinkovic J, Bojic M, Popovic AD. Early mitral regurgitation after acute myocardial infarction does not contribute to subsequent left ventricular remodeling. *Clin Cardiol*. 1999;22(2):91-94.
34. Nunez-Gil IJ, Estrada I, Perez de Isla L, et al. Functional mitral regurgitation after a first non-ST segment elevation acute coronary syndrome: very-long-term follow-up, prognosis and contribution to left ventricular enlargement and atrial fibrillation development. *Heart*. 2013;99(20):1502-1508.
35. Pastorius CA, Henry TD, Harris KM. Long-term outcomes of patients with mitral regurgitation undergoing percutaneous coronary intervention. *Am J Cardiol*. 2007;100(8):1218-1223.
36. Patel JB, Borgeson DD, Barnes ME, Rihal CS, Daly RC, Redfield MM. Mitral regurgitation in patients with advanced systolic heart failure. *J Card Fail*. 2004;10(4):285-291.
37. Pellizzon GG, Grines CL, Cox DA, et al. Importance of mitral regurgitation inpatients undergoing percutaneous coronary intervention for acute myocardial infarction: the Controlled Abciximab and Device Investigation to Lower Late Angioplasty Complications (CADILLAC) trial. *J Am Coll Cardiol*. 2004;43(8):1368-1374.
38. Perez de Isla L, Zamorano J, Quezada M, et al. Functional mitral regurgitation after a first non-ST-segment elevation acute coronary syndrome: contribution to congestive heart failure. *Eur Heart J*. 2007;28(23):2866-2872.
39. Persson A, Hartford M, Herlitz J, Karlsson T, Omland T, Caidahl K. Long-term prognostic value of mitral regurgitation in acute coronary syndromes. *Heart*. 2010;96(22):1803-1808.
40. Rihal CS, Nishimura RA, Hatle LK, Bailey KR, Tajik AJ. Systolic and diastolic dysfunction in patients with clinical diagnosis of dilated cardiomyopathy. Relation to symptoms and prognosis. *Circulation*. 1994;90(6):2772-2779.
41. Rossi A, Dini FL, Faggiano P, et al. Independent prognostic value of functional mitral regurgitation in patients with heart failure. A quantitative analysis of 1256 patients with ischaemic and non-ischaemic dilated cardiomyopathy. *Heart*. 2011;97(20):1675-1680.
42. Tcheng JE, Jackman JD, Jr., Nelson CL, et al. Outcome of patients sustaining acute ischemic mitral regurgitation during myocardial infarction. *Ann Intern Med*. 1992;117(1):18-24.
43. Trichon BH, Felker GM, Shaw LK, Cabell CH, O'Connor CM. Relation of frequency and severity of mitral regurgitation to survival among patients with left ventricular systolic dysfunction and heart failure. *Am J Cardiol*. 2003;91(5):538-543.
44. Uddin AM, Henry TD, Hodges JS, Haq Z, Pedersen WR, Harris KM. The prognostic role of mitral regurgitation after primary percutaneous coronary intervention for acute ST-elevation myocardial infarction. *Catheter Cardiovasc Interv*. 2012;80(5):779-786.
45. Upadhyay GA, Chatterjee NA, Kandala J, et al. Assessing mitral regurgitation in the prediction of clinical outcome after cardiac resynchronization therapy. *Heart rhythm*. 2015;12(6):1201-1208.
46. Kaneko H, Suzuki S, Uejima T, et al. Prevalence and the long-term prognosis of functional mitral regurgitation in Japanese patients with symptomatic heart failure. *Heart and vessels*. 2014;29(6):801-807.
47. Kwon DH, Kusunose K, Obuchowski NA, et al. Predictors and Prognostic Impact of Progressive Ischemic Mitral Regurgitation in Patients With Advanced Ischemic Cardiomyopathy: A Multimodality Study. *Circ Cardiovasc Imaging*. 2016;9(7).
48. Mallidi HR, Pelletier MP, Lamb J, et al. Late outcomes in patients with uncorrected mild to moderate mitral regurgitation at the time of isolated coronary artery bypass grafting. *J Thorac Cardiovasc Surg*. 2004;127(3):636-644.
49. Di Mauro M, Di Giammarco G, Vitolla G, et al. Impact of no-to-moderate mitral regurgitation on late results after isolated coronary artery bypass grafting in patients with ischemic cardiomyopathy. *Ann Thorac Surg*. 2006;81(6):2128-2134.
50. Okura H, Takada Y, Kubo T, et al. Functional mitral regurgitation predicts prognosis independent of left ventricular systolic and diastolic indices in patients with ischemic heart disease. *J Am Soc Echocardiogr*. 2008;21(4):355-360.
51. Stolfo D, Tonet E, Barbati G, et al. Acute Hemodynamic Response to Cardiac Resynchronization in Dilated Cardiomyopathy: Effect on Late Mitral Regurgitation. *Pacing Clin Electrophysiol*. 2015;38(11):1287-1296.
52. Verhaert D, Popovic ZB, De S, et al. Impact of mitral regurgitation on reverse remodeling and outcome in patients undergoing cardiac resynchronization therapy. *Circ Cardiovasc Imaging*. 2012;5(1):21-26.

53. Yalonetsky S, Eden H, Lessick J, et al. *Impact of functional mitral regurgitation on right ventricular function and outcome in patients with right ventricular infarction. Am J Cardiol.* 2014;114(1):36-41.
